# Supplementary material for: The Safety and Effectiveness of Early, Progressive Weight Bearing and Implant Choice after Traumatic Lower Extremity Fracture: A Systematic Review
Source: MDPI journal article supplement (doi:10.3390/bioengineering9120750), 2022-12-01
Supplement: s1 [file s1]

**Table S1. Outcomes from Included RCTs and Non-RCTs<sup>a</sup>**

| Outcomes                        | Study Types                                     | Study Sample Size, N | Fracture Location per Study | Outcome Specifics (RCT/non-RCT)                                                                                                                                                                                                                                                                   |
|---------------------------------|-------------------------------------------------|----------------------|-----------------------------|---------------------------------------------------------------------------------------------------------------------------------------------------------------------------------------------------------------------------------------------------------------------------------------------------|
| Standardized Outcome Measures   | 6 RCTs[9,15-18,20]/8 Non-RCTs[22-26,29-31]      | Range: 3-110         |                             | Olerud Molander Ankle Score (2/0)[15,16]                                                                                                                                                                                                                                                          |
|                                 |                                                 |                      |                             | Mazur Ankle Score (1/0)[18]                                                                                                                                                                                                                                                                       |
|                                 |                                                 |                      |                             | Kerr Calcaneal Score (0/1)[25]                                                                                                                                                                                                                                                                    |
|                                 |                                                 |                      |                             | Maryland Foot Function (1/0)[9]                                                                                                                                                                                                                                                                   |
|                                 |                                                 |                      |                             | American Orthopedic Foot and Ankle Society Ankle-Hindfoot Scale (2/0)[9,17]                                                                                                                                                                                                                       |
|                                 |                                                 |                      |                             | Harris Hip Score (0/1)[22]                                                                                                                                                                                                                                                                        |
|                                 |                                                 |                      |                             | Knee Injury and Osteoarthritis Outcome Score (0/1)[29]                                                                                                                                                                                                                                            |
|                                 |                                                 |                      |                             | Short Musculoskeletal Function Assessment (1/0)[20]                                                                                                                                                                                                                                               |
|                                 |                                                 |                      |                             | Gait Speed (0/3)[23,29,31]                                                                                                                                                                                                                                                                        |
|                                 |                                                 |                      |                             | Timed-Up-And-Go (0/1)[23]                                                                                                                                                                                                                                                                         |
| Non-union and/or malunion rates | 6 RCTs[9,14-16,18,20]/5 Non-RCTs[8,22,23,25,28] | Range: 3-110         | 2 Ankle                     | Berg Balance (0/1)[23]                                                                                                                                                                                                                                                                            |
|                                 |                                                 |                      | 3 Femoral                   | Ambulation Functional Independence Measure (0/1)[30]                                                                                                                                                                                                                                              |
|                                 |                                                 |                      | 4 Calcaneal                 | Neer Score (0/1)[24]                                                                                                                                                                                                                                                                              |
|                                 |                                                 |                      | 5 Tibial                    | Unspecified Functional Score (0/1)[26]                                                                                                                                                                                                                                                            |
| Healing time                    | 3 RCTs[14,18,20]/1 Non-RCT[28]                  | Range: 40-108        | 3 Ankle                     | Short Form 36 (2/0)[15,16]                                                                                                                                                                                                                                                                        |
|                                 |                                                 |                      | 2 Femoral                   |                                                                                                                                                                                                                                                                                                   |
| Bone density                    | 0                                               | --                   | 2 Calcaneal                 | Authors provided varying levels of specificity on this outcome, with some reporting group differences and statistical comparisons and others noting no loss of fixation. Early WBing groups fared better[16,18] or similar[9,15,20] on this outcome in direct comparisons with late WBing groups. |
|                                 |                                                 |                      | 4 Tibial                    |                                                                                                                                                                                                                                                                                                   |
| Healing time                    | 3 RCTs[14,18,20]/1 Non-RCT[28]                  | Range: 40-108        | 1 Ankle                     | Only one study[18] noted a difference in healing time between early and late WBing groups, with the early WBing group healing on average 66.5 days earlier.                                                                                                                                       |
|                                 |                                                 |                      | 3 Tibial                    |                                                                                                                                                                                                                                                                                                   |
| Bone density                    | 0                                               | --                   | --                          | None of the included studies (RCTs or Non-RCTs) included bone density as an outcome measure.                                                                                                                                                                                                      |

|                                                 |                                    |               |                                                 |                                                                                                                                                                                                                                                                                                                                                                                                                                                                          |
|-------------------------------------------------|------------------------------------|---------------|-------------------------------------------------|--------------------------------------------------------------------------------------------------------------------------------------------------------------------------------------------------------------------------------------------------------------------------------------------------------------------------------------------------------------------------------------------------------------------------------------------------------------------------|
| Assistance level with gait and functional tasks | 0 RCTs/3 Non-RCTs[22,23,27]        | Range: 3-22   | 2 Femoral<br>1 Tibial                           | This outcome was more observational than standardized across studies. Most authors noted the use of assistive devices[22,23] and time to return to function.[27]                                                                                                                                                                                                                                                                                                         |
| Falls                                           | 0 RCTs/2 Non-RCTs[21,22]           | Range: 17-21  | 2 Femoral                                       | Both studies that included this outcome investigated periprosthetic femoral fractures. A single fall was reported by Ehlinger et al.[21] and two by Eingartner et al.[22]                                                                                                                                                                                                                                                                                                |
| Infection Rates                                 | 4 RCTs[15-18]/3 Non-RCTs[21,22,25] | Range: 17-110 | 3 Ankle<br>2 Femoral<br>1 Calcaneal<br>1 Tibial | Infection rate was only counted as “reported” if authors stated a specific number of infections or noted none were observed. Infection rates ranged from 0-7 per study. In the RCTs, the early WBing groups had fewer or equal/not significantly different number of infections as the late WBing groups,[15,17] except in the study by Fadel et al.[18] and the one by Sanders et al.[16] where the early WBing group was the only one to include those post-operative. |

<sup>a</sup> RCTs = randomized controlled trials; Non-RCTs = non-randomized controlled trials; WBing = weight bearing.
