# Supplementary material for: The Safety and Effectiveness of Early, Progressive Weight Bearing and Implant Choice after Traumatic Lower Extremity Fracture: A Systematic Review
Source: MDPI journal article supplement (doi:10.3390/bioengineering9120750), 2022-12-01
Supplement: s1 [file s1]

**Table S3. Study Characteristics and Primary Outcomes of Included Non-RCT Studies<sup>a</sup>**

| Study<br>Country<br>(Bone or joint)                    | Participants                                                                                                                                                                                                   | N               | Weight bearing<br>timeline/precautions                                                                                                                                                                                                                                                          | Standardized outcome measure scores | Non-union/mal-union<br>rates | Healing time |
|--------------------------------------------------------|----------------------------------------------------------------------------------------------------------------------------------------------------------------------------------------------------------------|-----------------|-------------------------------------------------------------------------------------------------------------------------------------------------------------------------------------------------------------------------------------------------------------------------------------------------|-------------------------------------|------------------------------|--------------|
| Braun et al<br>Germany<br>(proximal femur)             | <u>Injury Description:</u><br>Intertrochanteric<br>femur fractures in<br>participants 65 or<br>older<br><u>Fixation:</u><br>Cephalomedullary<br>nail osteosynthesis<br><u>Age:</u> 81.6 years (65-<br>98)      | 22<br>(16F, 6M) | OpenGo pedobarography<br>insole; daily gait and<br>max/average amount of<br>WBiing recorded; physical<br>therapy 30 minutes/day;<br>immediate full WBiing allowed<br>with assistive device and<br>WBiing as tolerated with<br>activity; average max WBiing<br>of 124.7% bodyweight<br>observed. | --                                  | --                           | --           |
| Cunningham et al<br>United Kingdom<br>(tibia)          | <u>Injury Description:</u><br>Tibia fractures<br><u>Fixation:</u><br>External fixation<br><u>Age:</u> Not reported                                                                                             | 27              | WBiing as tolerated with<br>measurement of force every<br>two weeks.                                                                                                                                                                                                                            | --                                  | --                           | --           |
| Ehlinger et al<br>France<br>(peri-prosthetic<br>femur) | <u>Injury Description:</u><br>12 prosthetic hip<br>fractures, 1 between<br>hip prosthesis and<br>knee, 4 with knee<br>prosthesis<br><u>Fixation:</u><br>Locking compression<br>plate<br><u>Age:</u> 76.7 years | 17<br>(15F, 2M) | Immediate full WBiing on 10<br>cases, with partial Wbiing (20<br>kg) 3 cases, NWB 6 weeks 4<br>cases.                                                                                                                                                                                           | --                                  | --                           | --           |

|                                                  |                                                                                                                                                                                |                                                       |                                                                                                                                                                                                                             |                                                                                                                                                                                                                                                                                                                                                                                                                                                                 |                                                                                                                                                                                                         |    |
|--------------------------------------------------|--------------------------------------------------------------------------------------------------------------------------------------------------------------------------------|-------------------------------------------------------|-----------------------------------------------------------------------------------------------------------------------------------------------------------------------------------------------------------------------------|-----------------------------------------------------------------------------------------------------------------------------------------------------------------------------------------------------------------------------------------------------------------------------------------------------------------------------------------------------------------------------------------------------------------------------------------------------------------|---------------------------------------------------------------------------------------------------------------------------------------------------------------------------------------------------------|----|
| Eid and Deif<br>Egypt<br>(femur)                 | <u>Injury Description:</u><br>Group A: Single fracture of femoral shaft<br>Group B: Double fractures of femoral shafts                                                         |                                                       |                                                                                                                                                                                                                             |                                                                                                                                                                                                                                                                                                                                                                                                                                                                 |                                                                                                                                                                                                         |    |
|                                                  | <u>Fixation:</u><br>Group A: Kuntschner clover-leaf IMN<br>Group B: IMN x 2 (N=2); IMN + ORIF (N=1)                                                                            | 106<br>Group A: 103 (37F, 66M)<br>Group B: 3 (1F, 2M) | Both groups used axillary crutches for NWB after 2-3 weeks. WBing determined by radiographic exam. Some with straight cane with questionable callus. Full WBing with bridged callus.                                        | --                                                                                                                                                                                                                                                                                                                                                                                                                                                              | 14 non-unions out of 103 operations, 11 M/3 F. Increased non-union with earlier WBing (4-6 weeks statistically higher than those after). Group B: 0/3 middle fractures united, others did in 6-8 weeks. | -- |
| Eingartner et al<br>Germany<br>(peri-prosthetic) | <u>Injury Description:</u><br>Periprosthetic fractures of the femur                                                                                                            |                                                       | Bed rest 1 week-10 days; partial WBing (20 kg) at 14 <sup>th</sup> day; increased Wbing 10 kg/week starting week 12. Reduction in use of axillary crutches at 6 months.                                                     | Harris Hip Score, average = 70.5 points (29-95). Follow-up at average of 53.9 months (15-140)                                                                                                                                                                                                                                                                                                                                                                   | 1 delayed/non-union resulting in bone grafting                                                                                                                                                          | -- |
|                                                  | <u>Fixation:</u> IMN<br><u>Age:</u> 71.2 years (43-86 years)                                                                                                                   | 21<br>(13F, 8M)                                       |                                                                                                                                                                                                                             |                                                                                                                                                                                                                                                                                                                                                                                                                                                                 |                                                                                                                                                                                                         |    |
| Kim et al<br>South Korea<br>(tibia, fibula)      | Patient 1: 47 y/o M, tibial pilon fracture with ORIF.<br>Patient 2: 79 y/o M, tibia-fibula fracture with IMN & ORIF.<br>Patient 3: 33 y/o M, tibial plateau fracture with ORIF | 3                                                     | 3 weeks NWB, Week 1-4 training twice/day, specific percent bodyweight unique to each patient, with body weight support using a lower-body positive-pressure treadmill; Week 1 20-40% bodyweight, gradually increased 10-20% | 10-meter Walking Test post training & 6-month follow-up 15.96 & 9.34 (patient 1), 19.73 & 11.93 (patient 2), 26.96 & 8.77 (patient 3).<br>Timed Up-and-Go Test post training & 6-month follow-up 17.15 & 11.2 (patient 1), 18.67 & 12.37 (patient 2), 25.57 & 8.54 (patient 3).<br>Berg Balance Scale pre, post, and 6-month follow-up for patient 1, 37, 41, & 52. Post and 6-month follow-up 36 & 44 for patient 2. Six-month follow-up for patient 3 was 48. | 0                                                                                                                                                                                                       | -- |
|                                                  |                                                                                                                                                                                |                                                       |                                                                                                                                                                                                                             |                                                                                                                                                                                                                                                                                                                                                                                                                                                                 |                                                                                                                                                                                                         |    |

|                                                                   |                                                                                                                                                                                                                                                |                                           |                                                                                                                                                                                                                                                                                                                                                                       |                                                                                                                                                                                                                                                                                                                                                                                                                                                               |                                                                                                                                  |                                                    |
|-------------------------------------------------------------------|------------------------------------------------------------------------------------------------------------------------------------------------------------------------------------------------------------------------------------------------|-------------------------------------------|-----------------------------------------------------------------------------------------------------------------------------------------------------------------------------------------------------------------------------------------------------------------------------------------------------------------------------------------------------------------------|---------------------------------------------------------------------------------------------------------------------------------------------------------------------------------------------------------------------------------------------------------------------------------------------------------------------------------------------------------------------------------------------------------------------------------------------------------------|----------------------------------------------------------------------------------------------------------------------------------|----------------------------------------------------|
| Martinez et al<br>United States of<br>America<br>(proximal tibia) | <u>Injury Description:</u><br>Closed proximal tibia<br>fractures<br><u>Fixation:</u><br>Fracture bracing<br><u>Age:</u> 36.3 years                                                                                                             | 108<br>(19F, 89M)                         | Progressive WBing as<br>tolerated after discharge with<br>above-the-knee splint. 1<br>week out, prefabricated<br>functional brace if swelling<br>and acute pain gone.<br>Postponed another week if<br>not (range 4 days to 19.1<br>weeks, mean 11 days).<br>Progressive WBing as<br>tolerated with axillary<br>crutches. 1 week follow-up<br>post splint application. | --                                                                                                                                                                                                                                                                                                                                                                                                                                                            | 12% healed with >6<br>degrees of frontal<br>plane angulation. 2.8%<br>non-union rate. 8 pts<br>(8.4%) had > 10 mm<br>shortening. | Average 17.1<br>weeks (range<br>6.6-40.5<br>weeks) |
| Millar et al<br>Australia<br>(tibial plateau)                     | <u>Injury Description:</u><br>Tibial plateau<br>fractures<br><u>Fixation:</u><br>ORIF<br><u>Age:</u> 50.9 years +/-<br>13.1                                                                                                                    | 20<br>(11F, 9M)                           | WBing as tolerated<br>immediately post-operative<br>with axillary crutches as<br>needed for 6 weeks.                                                                                                                                                                                                                                                                  | Knee Injury and Osteoarthritis Outcome<br>Score (KOOS) - no sport/recreation<br>categories completed. Significant<br>improvements between 3 and 6 months<br>across pain, symptoms, and activities of daily<br>living. Six months to 2 years saw<br>improvement in the symptoms section.<br>Significant difference at each domain at 2<br>and 6 months when compared to 2 years.<br>Gait speed significantly improved at all<br>timepoints except 1 & 2 years. | --                                                                                                                               | --                                                 |
| Ohsawa et al<br>Japan<br>(proximal femur)                         | <u>Injury Description:</u><br>Intracapsular femur<br>fractures<br><u>Fixation:</u><br>Non-operative:<br>assertive early WBing<br>versus conventional<br>rehabilitation<br><u>Age:</u> Range 79-92<br>years<br>AG: 86.7 years<br>CG: 87.9 years | 20<br>13 AG (12F,<br>1M)<br>7 CG (6F, 1M) | WBing as tolerated within the<br>first month after beginning of<br>rehab (once patient could sit<br>in wheelchair for endurance<br>purposes).                                                                                                                                                                                                                         | <u>Pre-hip Function:</u><br>Face pain scale- AG 0, CG 0 (p = 1)<br>ROM- AG 4, CG 3.7 +/-0.5 (p = 0.373)<br>Ambulation FIM- AG 5, CG 5 (p = 1)<br><br><u>Post-hip Function:</u><br>Face pain scale- AG 12.6 +/-4.8, CG 10 (p =<br>0.390)<br>ROM- AG 4.1 +/-0.3, CG 3.9 +/-0.7 (p = 0.324)<br>Ambulation FIM- AG 18.2 +/-7.9, CG 9.4 +/-4.3<br>(p = 0.00135)                                                                                                    | --                                                                                                                               | --                                                 |

|                                                      |                                                                                                                                  |                                         |                                                                                                                                                                                                                                                                                                                                                                                                       |                                                                                                                                                                                                                                                                         |                                       |    |
|------------------------------------------------------|----------------------------------------------------------------------------------------------------------------------------------|-----------------------------------------|-------------------------------------------------------------------------------------------------------------------------------------------------------------------------------------------------------------------------------------------------------------------------------------------------------------------------------------------------------------------------------------------------------|-------------------------------------------------------------------------------------------------------------------------------------------------------------------------------------------------------------------------------------------------------------------------|---------------------------------------|----|
| Ostermann et al<br>Germany<br>(distal femur)         | <u>Injury Description:</u><br>Unicondylar femur fractures                                                                        |                                         |                                                                                                                                                                                                                                                                                                                                                                                                       |                                                                                                                                                                                                                                                                         |                                       |    |
|                                                      | <u>Fixation:</u><br>Open anatomic reduction, temporary fixation with Kirschner wires; definitive fixation with cancellous screws | 24<br>(5F, 19M)                         | 1 week out allowed to "eggshell" weight bear. Full WBing allowed after 6-8 weeks if no concomitant injuries.                                                                                                                                                                                                                                                                                          | Neer score: 20 excellent (average 91 units), 3 satisfactory (average 77 units), 1 unsatisfactory.                                                                                                                                                                       | --                                    | -- |
| Schildhauer et al<br>Germany<br>(calcaneal fracture) | <u>Injury Description:</u><br>Depression-type calcaneal fractures                                                                |                                         | Full WBing 8-12 weeks vs full WBing 3-6 weeks but only progressed to full WBing if first few patients were able to perform full WBing at 12 weeks successfully (i.e., the first 3 patients were not allowed to fully weight bear until 12 weeks. After achieving good clinical results, patients 4-16 were allowed to transition to full WBing at 8 wks. Last 3 patients were full WBing at 3 weeks). | Kerr Calcaneal Score (Pain 36 points, Work 25 points, Walking 25 points, Walking aid 14 points)<br>Average Kerr Calcaneal Score: 80.2 (Range 48-100). WBing 8 or 12 weeks post op averaged score 81.4; WB 3, 4 or 6 weeks post operative average score 78.9 (p = 0.56). | No loss of reduction at 3 weeks seen. | -- |
|                                                      | <u>Fixation:</u><br>ORIF augmented with calcium phosphate cement                                                                 | 32<br>(32M)<br>with 36 fractures        |                                                                                                                                                                                                                                                                                                                                                                                                       |                                                                                                                                                                                                                                                                         |                                       |    |
| Thewlis et al<br>Australia<br>(tibial plateau)       | <u>Injury Description:</u><br>Partial articular tibial plateau fractures                                                         |                                         | WBing as tolerated immediately post-operative with assistive devices for balance and comfort.                                                                                                                                                                                                                                                                                                         | Gait speed: Significant improvement over time, 2, 12, 26, and 52 weeks, with the mean differences at 2-26, 2-52, and 12-52.                                                                                                                                             | --                                    | -- |
|                                                      | <u>Fixation:</u><br>ORIF                                                                                                         | 9<br>(4F, 5M)                           |                                                                                                                                                                                                                                                                                                                                                                                                       |                                                                                                                                                                                                                                                                         |                                       |    |
| Zhang et al<br>China<br>(calcaneal fractures)        | <u>Injury Description:</u><br>Intra-articular calcaneal fractures                                                                |                                         | Initiated WBing functional exercise in boot within 24 hours, increased after 2 weeks, 3-4 weeks with crutches, WBing without assistive device in 8-10 weeks.                                                                                                                                                                                                                                          | Reported outcomes: 53 excellent, 41 good, 9 fair, 4 poor.                                                                                                                                                                                                               | --                                    | -- |
|                                                      | <u>Fixation:</u><br>Reduction with external fixation in calcaneus fixation boot                                                  | 102<br>(27F, 75M)<br>with 107 fractures |                                                                                                                                                                                                                                                                                                                                                                                                       |                                                                                                                                                                                                                                                                         |                                       |    |

<sup>a</sup> Non-RCT = non-randomized controlled trial; F = female; M = male; WBing = weight bearing; NWB = non-weight bearing; IMN = intramedullary nail; ORIF = open reduction internal fixation; AG = assertive group; CG = conventional group.
