# Supplementary material for: The Safety and Effectiveness of Early, Progressive Weight Bearing and Implant Choice after Traumatic Lower Extremity Fracture: A Systematic Review
Source: MDPI journal article supplement (doi:10.3390/bioengineering9120750), 2022-12-01
Supplement: s1 [file s1]

PubMed Searched on November 13, 2020  
(Pubmed searched via <https://pubmed.ncbi.nlm.nih.gov/>)

|                                                                                                                                                                                                                                                                                                                                                                                                                                                                                                                                                                                                                                                                                                                                                                                                                                                                                                                                                                                                                                                                                                                                                                                                                                                                                                                                                                                                                                                                                                                                                                                                                                                                                                                                                                                                                                                                                                                                                                                                                                                                                                                                                                                                                                                                                                                                                                                                                                                                                                                                                                                                                                                                                                                                                                                                                                                                                                                                                                                                                                                                                                                                                                                                                                                                                                                                                                                                                                                                                                                                                                                                |            |            |
|------------------------------------------------------------------------------------------------------------------------------------------------------------------------------------------------------------------------------------------------------------------------------------------------------------------------------------------------------------------------------------------------------------------------------------------------------------------------------------------------------------------------------------------------------------------------------------------------------------------------------------------------------------------------------------------------------------------------------------------------------------------------------------------------------------------------------------------------------------------------------------------------------------------------------------------------------------------------------------------------------------------------------------------------------------------------------------------------------------------------------------------------------------------------------------------------------------------------------------------------------------------------------------------------------------------------------------------------------------------------------------------------------------------------------------------------------------------------------------------------------------------------------------------------------------------------------------------------------------------------------------------------------------------------------------------------------------------------------------------------------------------------------------------------------------------------------------------------------------------------------------------------------------------------------------------------------------------------------------------------------------------------------------------------------------------------------------------------------------------------------------------------------------------------------------------------------------------------------------------------------------------------------------------------------------------------------------------------------------------------------------------------------------------------------------------------------------------------------------------------------------------------------------------------------------------------------------------------------------------------------------------------------------------------------------------------------------------------------------------------------------------------------------------------------------------------------------------------------------------------------------------------------------------------------------------------------------------------------------------------------------------------------------------------------------------------------------------------------------------------------------------------------------------------------------------------------------------------------------------------------------------------------------------------------------------------------------------------------------------------------------------------------------------------------------------------------------------------------------------------------------------------------------------------------------------------------------------------|------------|------------|
| <p>(("progressive"[Title/Abstract] OR "progress"[Title/Abstract] OR "progression"[Title/Abstract] OR "progressively"[Title/Abstract] OR "progressing"[Title/Abstract] OR "continuous"[Title/Abstract] OR "continuously"[Title/Abstract] OR "increase"[Title/Abstract] OR "increasing"[Title/Abstract] OR "increased"[Title/Abstract] OR "growing"[Title/Abstract] OR "escalating"[Title/Abstract] OR "escalate"[Title/Abstract] OR "escalated"[Title/Abstract] OR "escalation"[Title/Abstract] OR "accelerating"[Title/Abstract] OR "accelerate"[Title/Abstract] OR "accelerated"[Title/Abstract] OR "acceleration"[Title/Abstract] OR "accelerations"[Title/Abstract] OR "rising"[Title/Abstract] OR "intensified"[Title/Abstract] OR ("intensification"[All Fields] OR "intensifications"[All Fields]) OR "intensifying"[Title/Abstract] OR "gradual"[Title/Abstract] OR "gradually"[Title/Abstract] OR "gradation"[Title/Abstract] OR "gradient"[Title/Abstract] OR "gradation"[Title/Abstract] OR "advancing"[Title/Abstract] OR "rising"[Title/Abstract] OR "mounting"[Title/Abstract] OR "graduated"[Title/Abstract] OR "titrated"[Title/Abstract] OR "titrate"[Title/Abstract] OR "titration"[Title/Abstract] OR ("increment"[All Fields] OR "incremented"[All Fields] OR "incrementing"[All Fields] OR "increments"[All Fields]) OR "increment"[Title/Abstract] OR "incremental"[Title/Abstract] OR "incrementally"[Title/Abstract]) AND ("weight bearing"[MeSH Terms] OR "weight bearing"[All Fields] OR "weight bearing"[All Fields] OR ("weight bearing"[MeSH Terms] OR "weight bearing"[All Fields] OR "weightbearing"[All Fields] OR "weightbear"[All Fields]) OR ("weight bearing"[MeSH Terms] OR "weight bearing"[All Fields] OR "loadbearing"[All Fields] OR "load bearing"[All Fields] OR "Axial Loading"[All Fields] OR "Axial Loadings"[All Fields] OR ("weight s"[All Fields] OR "weighted"[All Fields] OR "weighting"[All Fields] OR "weightings"[All Fields] OR "weights and measures"[MeSH Terms] OR ("weights"[All Fields] AND "measures"[All Fields]) OR "weights and measures"[All Fields] OR "weight"[All Fields] OR "body weight"[MeSH Terms] OR ("body"[All Fields] AND "weight"[All Fields]) OR "body weight"[All Fields] OR "weights"[All Fields]) AND "bear*"[All Fields])) AND ("exercise"[MeSH Terms] OR "exercise"[All Fields] OR "exercises"[All Fields] OR "exercise therapy"[MeSH Terms] OR ("exercise"[All Fields] AND "therapy"[All Fields]) OR "exercise therapy"[All Fields] OR "exercise s"[All Fields] OR "exercised"[All Fields] OR "exerciser"[All Fields] OR "exercisers"[All Fields] OR "exercising"[All Fields] OR ("exercise"[MeSH Terms] OR "exercise"[All Fields] OR "exercises"[All Fields] OR "exercise therapy"[MeSH Terms] OR ("exercise"[All Fields] AND "therapy"[All Fields]) OR "exercise therapy"[All Fields] OR "exercise s"[All Fields] OR "exercised"[All Fields] OR "exerciser"[All Fields] OR "exercisers"[All Fields] OR "exercising"[All Fields]) OR ("exercise"[MeSH Terms] OR "exercise"[All Fields] OR "exercises"[All Fields] OR "exercise therapy"[MeSH Terms] OR ("exercise"[All Fields] AND "therapy"[All Fields]) OR "exercise therapy"[All Fields] OR "exercise s"[All Fields] OR "exercised"[All Fields] OR "exerciser"[All Fields] OR "exercisers"[All Fields] OR "exercising"[All Fields]) OR "exercised"[All Fields] OR ("clinical protocols"[MeSH Terms] OR ("clinical"[All Fields] AND "protocols"[All Fields]) OR "clinical protocols"[All Fields] OR "regimen"[All Fields] OR "regimen s"[All Fields]</p> | <p>860</p> | <p>860</p> |
|------------------------------------------------------------------------------------------------------------------------------------------------------------------------------------------------------------------------------------------------------------------------------------------------------------------------------------------------------------------------------------------------------------------------------------------------------------------------------------------------------------------------------------------------------------------------------------------------------------------------------------------------------------------------------------------------------------------------------------------------------------------------------------------------------------------------------------------------------------------------------------------------------------------------------------------------------------------------------------------------------------------------------------------------------------------------------------------------------------------------------------------------------------------------------------------------------------------------------------------------------------------------------------------------------------------------------------------------------------------------------------------------------------------------------------------------------------------------------------------------------------------------------------------------------------------------------------------------------------------------------------------------------------------------------------------------------------------------------------------------------------------------------------------------------------------------------------------------------------------------------------------------------------------------------------------------------------------------------------------------------------------------------------------------------------------------------------------------------------------------------------------------------------------------------------------------------------------------------------------------------------------------------------------------------------------------------------------------------------------------------------------------------------------------------------------------------------------------------------------------------------------------------------------------------------------------------------------------------------------------------------------------------------------------------------------------------------------------------------------------------------------------------------------------------------------------------------------------------------------------------------------------------------------------------------------------------------------------------------------------------------------------------------------------------------------------------------------------------------------------------------------------------------------------------------------------------------------------------------------------------------------------------------------------------------------------------------------------------------------------------------------------------------------------------------------------------------------------------------------------------------------------------------------------------------------------------------------------|------------|------------|

|                                                                                                                                                                                                                                                                                                                                                                                                                                                                                                                                                                                                                                                                                                                                                                                                                                                                                                                                                                                                                                                                                                                                                                                                                                                                                                                                                                                                                                                                                                                                                                                                                                                                                                                                                                                                                                                                                                                                                                                                                                                                                                                                                                                                                                                                                                                                                                                                                                                                                                                                                                                                                                                                                                                                                                                                                                                                                                                                                                                                                                                                                                                                                                                                                                                                                                                                                                                                                                                                                                                                                                                                                                                                                                                                                                                                                                                                                                            |  |  |
|------------------------------------------------------------------------------------------------------------------------------------------------------------------------------------------------------------------------------------------------------------------------------------------------------------------------------------------------------------------------------------------------------------------------------------------------------------------------------------------------------------------------------------------------------------------------------------------------------------------------------------------------------------------------------------------------------------------------------------------------------------------------------------------------------------------------------------------------------------------------------------------------------------------------------------------------------------------------------------------------------------------------------------------------------------------------------------------------------------------------------------------------------------------------------------------------------------------------------------------------------------------------------------------------------------------------------------------------------------------------------------------------------------------------------------------------------------------------------------------------------------------------------------------------------------------------------------------------------------------------------------------------------------------------------------------------------------------------------------------------------------------------------------------------------------------------------------------------------------------------------------------------------------------------------------------------------------------------------------------------------------------------------------------------------------------------------------------------------------------------------------------------------------------------------------------------------------------------------------------------------------------------------------------------------------------------------------------------------------------------------------------------------------------------------------------------------------------------------------------------------------------------------------------------------------------------------------------------------------------------------------------------------------------------------------------------------------------------------------------------------------------------------------------------------------------------------------------------------------------------------------------------------------------------------------------------------------------------------------------------------------------------------------------------------------------------------------------------------------------------------------------------------------------------------------------------------------------------------------------------------------------------------------------------------------------------------------------------------------------------------------------------------------------------------------------------------------------------------------------------------------------------------------------------------------------------------------------------------------------------------------------------------------------------------------------------------------------------------------------------------------------------------------------------------------------------------------------------------------------------------------------------------------|--|--|
| <p>OR "regimens"[All Fields]) OR (("physical examination"[MeSH Terms] OR ("physical"[All Fields] AND "examination"[All Fields]) OR "physical examination"[All Fields] OR "physical"[All Fields] OR "physically"[All Fields] OR "physicals"[All Fields]) AND ("therapeutics"[MeSH Terms] OR "therapeutics"[All Fields] OR "therapies"[All Fields] OR "therapy"[MeSH Subheading] OR "therapy"[All Fields] OR "therapy s"[All Fields] OR "therapys"[All Fields] OR ("medicine"[All Fields] OR "medicinal"[All Fields] OR "medicinally"[All Fields] OR "medicinals"[All Fields] OR "medicine"[MeSH Terms] OR "medicine"[All Fields] OR "medicine s"[All Fields] OR "medicines"[All Fields]) OR ("rehabilitation"[MeSH Terms] OR "rehabilitation"[All Fields] OR "rehab"[All Fields] OR "rehab s"[All Fields]) OR ("rehabilitant"[All Fields] OR "rehabilitants"[All Fields] OR "rehabilitate"[All Fields] OR "rehabilitated"[All Fields] OR "rehabilitates"[All Fields] OR "rehabilitating"[All Fields] OR "rehabilitation"[MeSH Terms] OR "rehabilitation"[All Fields] OR "rehabilitations"[All Fields] OR "rehabilitative"[All Fields] OR "rehabilitation"[MeSH Subheading] OR "rehabilitation s"[All Fields] OR "rehabilitational"[All Fields] OR "rehabilitator"[All Fields] OR "rehabilitators"[All Fields])))) OR ("physical therapy modalities"[MeSH Terms] OR ("physical"[All Fields] AND "therapy"[All Fields] AND "modalities"[All Fields]) OR "physical therapy modalities"[All Fields] OR "physiotherapies"[All Fields] OR "physiotherapy"[All Fields] OR ("physical therapy modalities"[MeSH Terms] OR ("physical"[All Fields] AND "therapy"[All Fields] AND "modalities"[All Fields]) OR "physical therapy modalities"[All Fields] OR "physiotherapies"[All Fields] OR "physiotherapy"[All Fields] OR ("therapeutical"[All Fields] OR "therapeutically"[All Fields] OR "therapeutics"[All Fields] OR "therapeutics"[MeSH Terms] OR "therapeutics"[All Fields] OR "therapeutic"[All Fields]) OR ("therapeutics"[MeSH Terms] OR "therapeutics"[All Fields] OR "therapies"[All Fields] OR "therapy"[MeSH Subheading] OR "therapy"[All Fields] OR "therapy s"[All Fields] OR "therapys"[All Fields]) OR ("physiatric"[All Fields] OR "physical and rehabilitation medicine"[MeSH Terms] OR ("physical"[All Fields] AND "rehabilitation"[All Fields] AND "medicine"[All Fields]) OR "physical and rehabilitation medicine"[All Fields] OR "physiatrics"[All Fields]) OR ("physical and rehabilitation medicine"[MeSH Terms] OR ("physical"[All Fields] AND "rehabilitation"[All Fields] AND "medicine"[All Fields]) OR "physical and rehabilitation medicine"[All Fields] OR "physiatry"[All Fields])) AND (("fractur"[All Fields] OR "fractural"[All Fields] OR "fracture s"[All Fields] OR "fractures, bone"[MeSH Terms] OR ("fractures"[All Fields] AND "bone"[All Fields]) OR "bone fractures"[All Fields] OR "fracture"[All Fields] OR "fractured"[All Fields] OR "fractures"[All Fields] OR "fracturing"[All Fields] OR ("fractur"[All Fields] OR "fractural"[All Fields] OR "fracture s"[All Fields] OR "fractures, bone"[MeSH Terms] OR ("fractures"[All Fields] AND "bone"[All Fields]) OR "bone fractures"[All Fields] OR "fracture"[All Fields] OR "fractured"[All Fields] OR "fractures"[All Fields] OR "fracturing"[All Fields] OR "break"[All Fields] OR "breaking"[All Fields] OR "breakings"[All Fields] OR "breaks"[All Fields]) OR "broke"[All Fields] OR "broken"[All Fields] OR "fractures, bone"[MeSH Terms] OR "Fracture Healing"[MeSH Terms] OR "Fracture Healings"[All Fields] OR "healing fracture"[All Fields]) AND ("tibia"[MeSH Terms] OR "tibia"[All Fields] OR "tibias"[All Fields] OR "tibia s"[All Fields] OR "tibiae"[All Fields] OR ("fibula"[MeSH Terms] OR "fibula"[All Fields] OR "fibulas"[All Fields] OR "fibulae"[All Fields]) OR ("femur"[MeSH Terms] OR</p> |  |  |
|------------------------------------------------------------------------------------------------------------------------------------------------------------------------------------------------------------------------------------------------------------------------------------------------------------------------------------------------------------------------------------------------------------------------------------------------------------------------------------------------------------------------------------------------------------------------------------------------------------------------------------------------------------------------------------------------------------------------------------------------------------------------------------------------------------------------------------------------------------------------------------------------------------------------------------------------------------------------------------------------------------------------------------------------------------------------------------------------------------------------------------------------------------------------------------------------------------------------------------------------------------------------------------------------------------------------------------------------------------------------------------------------------------------------------------------------------------------------------------------------------------------------------------------------------------------------------------------------------------------------------------------------------------------------------------------------------------------------------------------------------------------------------------------------------------------------------------------------------------------------------------------------------------------------------------------------------------------------------------------------------------------------------------------------------------------------------------------------------------------------------------------------------------------------------------------------------------------------------------------------------------------------------------------------------------------------------------------------------------------------------------------------------------------------------------------------------------------------------------------------------------------------------------------------------------------------------------------------------------------------------------------------------------------------------------------------------------------------------------------------------------------------------------------------------------------------------------------------------------------------------------------------------------------------------------------------------------------------------------------------------------------------------------------------------------------------------------------------------------------------------------------------------------------------------------------------------------------------------------------------------------------------------------------------------------------------------------------------------------------------------------------------------------------------------------------------------------------------------------------------------------------------------------------------------------------------------------------------------------------------------------------------------------------------------------------------------------------------------------------------------------------------------------------------------------------------------------------------------------------------------------------------------------|--|--|

|                                                                                                                                                                                                                                                                                                                                                                                                                                                                                                                                                                                                                                                                                                                                                                                                                                                                                                                                                                                                                                                                                                                                                                                                                                                                                                                                                                                                                                                                                                                                                                                                                                                                                                                                                                                                                                                                                                                                                                                                                                                                                                                                                                                                                                                                                                                                                                                                                                                                                 |       |  |
|---------------------------------------------------------------------------------------------------------------------------------------------------------------------------------------------------------------------------------------------------------------------------------------------------------------------------------------------------------------------------------------------------------------------------------------------------------------------------------------------------------------------------------------------------------------------------------------------------------------------------------------------------------------------------------------------------------------------------------------------------------------------------------------------------------------------------------------------------------------------------------------------------------------------------------------------------------------------------------------------------------------------------------------------------------------------------------------------------------------------------------------------------------------------------------------------------------------------------------------------------------------------------------------------------------------------------------------------------------------------------------------------------------------------------------------------------------------------------------------------------------------------------------------------------------------------------------------------------------------------------------------------------------------------------------------------------------------------------------------------------------------------------------------------------------------------------------------------------------------------------------------------------------------------------------------------------------------------------------------------------------------------------------------------------------------------------------------------------------------------------------------------------------------------------------------------------------------------------------------------------------------------------------------------------------------------------------------------------------------------------------------------------------------------------------------------------------------------------------|-------|--|
| <p>"femur"[All Fields] OR "femurs"[All Fields] OR "femur s"[All Fields] OR "femural"[All Fields] OR "femure"[All Fields]) OR ("patella"[MeSH Terms] OR "patella"[All Fields] OR "patellas"[All Fields] OR "patella s"[All Fields] OR "patellae"[All Fields]) OR ("talus"[MeSH Terms] OR "talus"[All Fields]) OR ("calcaneus"[MeSH Terms] OR "calcaneus"[All Fields]) OR ("cuboids"[All Fields] OR "tarsal bones"[MeSH Terms] OR ("tarsal"[All Fields] AND "bones"[All Fields]) OR "tarsal bones"[All Fields] OR "cuboid"[All Fields]) OR ("metatarsal bones"[MeSH Terms] OR ("metatarsal"[All Fields] AND "bones"[All Fields]) OR "metatarsal bones"[All Fields] OR "metatarsal"[All Fields] OR "metatarsals"[All Fields]) OR ("naviculare"[All Fields] OR "naviculars"[All Fields] OR "tarsal bones"[MeSH Terms] OR ("tarsal"[All Fields] AND "bones"[All Fields]) OR "tarsal bones"[All Fields] OR "navicular"[All Fields]) OR ("finger phalanges"[MeSH Terms] OR ("finger"[All Fields] AND "phalanges"[All Fields]) OR "finger phalanges"[All Fields] OR "phalanx"[All Fields] OR "phalanxes"[All Fields]) OR ("cuneiform"[All Fields] OR "cuneiforme"[All Fields] OR "cuneiforms"[All Fields]) OR ("ischium"[MeSH Terms] OR "ischium"[All Fields]) OR "tibiofibular"[All Fields])</p>                                                                                                                                                                                                                                                                                                                                                                                                                                                                                                                                                                                                                                                                                                                                                                                                                                                                                                                                                                                                                                                                                                                                                                                       |       |  |
| <p>("fractur"[All Fields] OR "fractural"[All Fields] OR "fracture s"[All Fields] OR "fractures, bone"[MeSH Terms] OR ("fractures"[All Fields] AND "bone"[All Fields]) OR "bone fractures"[All Fields] OR "fracture"[All Fields] OR "fractured"[All Fields] OR "fractures"[All Fields] OR "fracturing"[All Fields] OR ("fractur"[All Fields] OR "fractural"[All Fields] OR "fracture s"[All Fields] OR "fractures, bone"[MeSH Terms] OR ("fractures"[All Fields] AND "bone"[All Fields]) OR "bone fractures"[All Fields] OR "fracture"[All Fields] OR "fractured"[All Fields] OR "fractures"[All Fields] OR "fracturing"[All Fields]) OR ("break"[All Fields] OR "breaking"[All Fields] OR "breakings"[All Fields] OR "breaks"[All Fields] OR "broke"[All Fields] OR "broken"[All Fields] OR "fractures, bone"[MeSH Terms] OR "Fracture Healing"[MeSH Terms] OR "Fracture Healings"[All Fields] OR "healing fracture"[All Fields]) AND ("tibia"[MeSH Terms] OR "tibia"[All Fields] OR "tibias"[All Fields] OR "tibia s"[All Fields] OR "tibiae"[All Fields] OR ("fibula"[MeSH Terms] OR "fibula"[All Fields] OR "fibulas"[All Fields] OR "fibulae"[All Fields]) OR ("femur"[MeSH Terms] OR "femur"[All Fields] OR "femurs"[All Fields] OR "femur s"[All Fields] OR "femural"[All Fields] OR "femure"[All Fields] OR ("patella"[MeSH Terms] OR "patella"[All Fields] OR "patellas"[All Fields] OR "patella s"[All Fields] OR "patellae"[All Fields]) OR ("talus"[MeSH Terms] OR "talus"[All Fields]) OR ("calcaneus"[MeSH Terms] OR "calcaneus"[All Fields]) OR ("cuboids"[All Fields] OR "tarsal bones"[MeSH Terms] OR ("tarsal"[All Fields] AND "bones"[All Fields]) OR "tarsal bones"[All Fields] OR "cuboid"[All Fields]) OR ("metatarsal bones"[MeSH Terms] OR ("metatarsal"[All Fields] AND "bones"[All Fields]) OR "metatarsal bones"[All Fields] OR "metatarsal"[All Fields] OR "metatarsals"[All Fields]) OR ("naviculare"[All Fields] OR "naviculars"[All Fields] OR "tarsal bones"[MeSH Terms] OR ("tarsal"[All Fields] AND "bones"[All Fields]) OR "tarsal bones"[All Fields] OR "navicular"[All Fields]) OR ("finger phalanges"[MeSH Terms] OR ("finger"[All Fields] AND "phalanges"[All Fields]) OR "finger phalanges"[All Fields] OR "phalanx"[All Fields] OR "phalanxes"[All Fields]) OR ("cuneiform"[All Fields] OR "cuneiforme"[All Fields] OR "cuneiforms"[All Fields]) OR ("ischium"[MeSH Terms] OR "ischium"[All Fields]) OR "tibiofibular"[All Fields])</p> | 55324 |  |
| <p>("progressive"[Title/Abstract] OR "progress"[Title/Abstract] OR "progression"[Title/Abstract] OR "progressively"[Title/Abstract] OR</p>                                                                                                                                                                                                                                                                                                                                                                                                                                                                                                                                                                                                                                                                                                                                                                                                                                                                                                                                                                                                                                                                                                                                                                                                                                                                                                                                                                                                                                                                                                                                                                                                                                                                                                                                                                                                                                                                                                                                                                                                                                                                                                                                                                                                                                                                                                                                      | 12336 |  |

|                                                                                                                                                                                                                                                                                                                                                                                                                                                                                                                                                                                                                                                                                                                                                                                                                                                                                                                                                                                                                                                                                                                                                                                                                                                                                                                                                                                                                                                                                                                                                                                                                                                                                                                                                                                                                                                                                                                                                                                                                                                                                                                                                                                                                                                                                                                                                                                                                                                                                                                                                                                                                                                                                                                                                                                                                                                                                                                                                                                                                                                                                                                                                                                                                                                                                                                                                                                                                                                                                                                                                                                                                                                                                                                                                 |  |  |
|-------------------------------------------------------------------------------------------------------------------------------------------------------------------------------------------------------------------------------------------------------------------------------------------------------------------------------------------------------------------------------------------------------------------------------------------------------------------------------------------------------------------------------------------------------------------------------------------------------------------------------------------------------------------------------------------------------------------------------------------------------------------------------------------------------------------------------------------------------------------------------------------------------------------------------------------------------------------------------------------------------------------------------------------------------------------------------------------------------------------------------------------------------------------------------------------------------------------------------------------------------------------------------------------------------------------------------------------------------------------------------------------------------------------------------------------------------------------------------------------------------------------------------------------------------------------------------------------------------------------------------------------------------------------------------------------------------------------------------------------------------------------------------------------------------------------------------------------------------------------------------------------------------------------------------------------------------------------------------------------------------------------------------------------------------------------------------------------------------------------------------------------------------------------------------------------------------------------------------------------------------------------------------------------------------------------------------------------------------------------------------------------------------------------------------------------------------------------------------------------------------------------------------------------------------------------------------------------------------------------------------------------------------------------------------------------------------------------------------------------------------------------------------------------------------------------------------------------------------------------------------------------------------------------------------------------------------------------------------------------------------------------------------------------------------------------------------------------------------------------------------------------------------------------------------------------------------------------------------------------------------------------------------------------------------------------------------------------------------------------------------------------------------------------------------------------------------------------------------------------------------------------------------------------------------------------------------------------------------------------------------------------------------------------------------------------------------------------------------------------------|--|--|
| <p> "progressing"[Title/Abstract] OR "continuous"[Title/Abstract] OR<br/> "continuously"[Title/Abstract] OR "increase"[Title/Abstract] OR<br/> "increasing"[Title/Abstract] OR "increased"[Title/Abstract] OR<br/> "growing"[Title/Abstract] OR "escalating"[Title/Abstract] OR<br/> "escalate"[Title/Abstract] OR "escalated"[Title/Abstract] OR<br/> "escalation"[Title/Abstract] OR "accelerating"[Title/Abstract] OR<br/> "accelerate"[Title/Abstract] OR "accelerated"[Title/Abstract] OR<br/> "acceleration"[Title/Abstract] OR "accelerations"[Title/Abstract] OR<br/> "rising"[Title/Abstract] OR "intesified"[Title/Abstract] OR<br/> ("intensification"[All Fields] OR "intensifications"[All Fields]) OR<br/> "intensifying"[Title/Abstract] OR "gradual"[Title/Abstract] OR<br/> "gradually"[Title/Abstract] OR "gradation"[Title/Abstract] OR<br/> "gradient"[Title/Abstract] OR "gradation"[Title/Abstract] OR<br/> "advancing"[Title/Abstract] OR "rising"[Title/Abstract] OR<br/> "mounting"[Title/Abstract] OR "graduated"[Title/Abstract] OR<br/> "titrated"[Title/Abstract] OR "titrate"[Title/Abstract] OR<br/> "titration"[Title/Abstract] OR ("increment"[All Fields] OR<br/> "incremented"[All Fields] OR "incrementing"[All Fields] OR<br/> "increments"[All Fields]) OR "increment"[Title/Abstract] OR<br/> "incremental"[Title/Abstract] OR "incrementally"[Title/Abstract]) AND<br/> ("weight bearing"[MeSH Terms] OR "weight bearing"[All Fields] OR<br/> "weight bearing"[All Fields] OR ("weight bearing"[MeSH Terms] OR<br/> "weight bearing"[All Fields] OR "weightbearing"[All Fields] OR<br/> "weightbear"[All Fields]) OR ("weight bearing"[MeSH Terms] OR<br/> "weight bearing"[All Fields] OR "loadbearing"[All Fields]) OR "load<br/> bearing"[All Fields] OR "load bearing"[All Fields] OR "Axial Loading"[All<br/> Fields] OR "Axial Loadings"[All Fields] OR ("weight s"[All Fields] OR<br/> "weighted"[All Fields] OR "weighting"[All Fields] OR "weightings"[All<br/> Fields] OR "weights and measures"[MeSH Terms] OR ("weights"[All<br/> Fields] AND "measures"[All Fields]) OR "weights and measures"[All<br/> Fields] OR "weight"[All Fields] OR "body weight"[MeSH Terms] OR<br/> ("body"[All Fields] AND "weight"[All Fields]) OR "body weight"[All Fields]<br/> OR "weights"[All Fields]) AND "bear*"[All Fields])) AND<br/> ("exercise"[MeSH Terms] OR "exercise"[All Fields] OR "exercises"[All<br/> Fields] OR "exercise therapy"[MeSH Terms] OR ("exercise"[All Fields]<br/> AND "therapy"[All Fields]) OR "exercise therapy"[All Fields] OR<br/> "exercise s"[All Fields] OR "exercised"[All Fields] OR "exerciser"[All<br/> Fields] OR "exercisers"[All Fields] OR "exercising"[All Fields] OR<br/> ("exercise"[MeSH Terms] OR "exercise"[All Fields] OR "exercises"[All<br/> Fields] OR "exercise therapy"[MeSH Terms] OR ("exercise"[All Fields]<br/> AND "therapy"[All Fields]) OR "exercise therapy"[All Fields] OR<br/> "exercise s"[All Fields] OR "exercised"[All Fields] OR "exerciser"[All<br/> Fields] OR "exercisers"[All Fields] OR "exercising"[All Fields]) OR<br/> "excercised"[All Fields] OR ("clinical protocols"[MeSH Terms] OR<br/> ("clinical"[All Fields] AND "protocols"[All Fields]) OR "clinical<br/> protocols"[All Fields] OR "regimen"[All Fields] OR "regimen s"[All Fields]<br/> OR "regimens"[All Fields]) OR ("physical examination"[MeSH Terms]<br/> OR ("physical"[All Fields] AND "examination"[All Fields]) OR "physical<br/> examination"[All Fields] OR "physical"[All Fields] OR "physically"[All<br/> Fields] OR "physicals"[All Fields]) AND ("therapeutics"[MeSH Terms]<br/> OR "therapeutics"[All Fields] OR "therapies"[All Fields] OR </p> |  |  |
|-------------------------------------------------------------------------------------------------------------------------------------------------------------------------------------------------------------------------------------------------------------------------------------------------------------------------------------------------------------------------------------------------------------------------------------------------------------------------------------------------------------------------------------------------------------------------------------------------------------------------------------------------------------------------------------------------------------------------------------------------------------------------------------------------------------------------------------------------------------------------------------------------------------------------------------------------------------------------------------------------------------------------------------------------------------------------------------------------------------------------------------------------------------------------------------------------------------------------------------------------------------------------------------------------------------------------------------------------------------------------------------------------------------------------------------------------------------------------------------------------------------------------------------------------------------------------------------------------------------------------------------------------------------------------------------------------------------------------------------------------------------------------------------------------------------------------------------------------------------------------------------------------------------------------------------------------------------------------------------------------------------------------------------------------------------------------------------------------------------------------------------------------------------------------------------------------------------------------------------------------------------------------------------------------------------------------------------------------------------------------------------------------------------------------------------------------------------------------------------------------------------------------------------------------------------------------------------------------------------------------------------------------------------------------------------------------------------------------------------------------------------------------------------------------------------------------------------------------------------------------------------------------------------------------------------------------------------------------------------------------------------------------------------------------------------------------------------------------------------------------------------------------------------------------------------------------------------------------------------------------------------------------------------------------------------------------------------------------------------------------------------------------------------------------------------------------------------------------------------------------------------------------------------------------------------------------------------------------------------------------------------------------------------------------------------------------------------------------------------------------|--|--|

|                                                                                                                                                                                                                                                                                                                                                                                                                                                                                                                                                                                                                                                                                                                                                                                                                                                                                                                                                                                                                                                                                                                                                                                                                                                                                                                                                                                                                                                                                                                                                                                                                                                                                                                                                                                                                                                                                                                                                                                                                                                                                                                                                                                                                                                                                                                                                       |  |  |
|-------------------------------------------------------------------------------------------------------------------------------------------------------------------------------------------------------------------------------------------------------------------------------------------------------------------------------------------------------------------------------------------------------------------------------------------------------------------------------------------------------------------------------------------------------------------------------------------------------------------------------------------------------------------------------------------------------------------------------------------------------------------------------------------------------------------------------------------------------------------------------------------------------------------------------------------------------------------------------------------------------------------------------------------------------------------------------------------------------------------------------------------------------------------------------------------------------------------------------------------------------------------------------------------------------------------------------------------------------------------------------------------------------------------------------------------------------------------------------------------------------------------------------------------------------------------------------------------------------------------------------------------------------------------------------------------------------------------------------------------------------------------------------------------------------------------------------------------------------------------------------------------------------------------------------------------------------------------------------------------------------------------------------------------------------------------------------------------------------------------------------------------------------------------------------------------------------------------------------------------------------------------------------------------------------------------------------------------------------|--|--|
| "therapy"[MeSH Subheading] OR "therapy"[All Fields] OR "therapy s"[All Fields] OR "therapys"[All Fields] OR ("medicin"[All Fields] OR "medicinal"[All Fields] OR "medicinally"[All Fields] OR "medicinals"[All Fields] OR "medicine"[MeSH Terms] OR "medicine"[All Fields] OR "medicine s"[All Fields] OR "medicines"[All Fields]) OR ("rehabilitation"[MeSH Terms] OR "rehabilitation"[All Fields] OR "rehab"[All Fields] OR "rehab[s]"[All Fields]) OR ("rehabilitant"[All Fields] OR "rehabilitants"[All Fields] OR "rehabilitate"[All Fields] OR "rehabilitated"[All Fields] OR "rehabilitates"[All Fields] OR "rehabilitating"[All Fields] OR "rehabilitation"[MeSH Terms] OR "rehabilitation"[All Fields] OR "rehabilitations"[All Fields] OR "rehabilitative"[All Fields] OR "rehabilitation"[MeSH Subheading] OR "rehabilitation s"[All Fields] OR "rehabilitational"[All Fields] OR "rehabilitator"[All Fields] OR "rehabilitators"[All Fields])) OR ("physical therapy modalities"[MeSH Terms] OR ("physical"[All Fields] AND "therapy"[All Fields] AND "modalities"[All Fields]) OR "physical therapy modalities"[All Fields] OR "physiotherapies"[All Fields] OR "physiotherapy"[All Fields]) OR ("physical therapy modalities"[MeSH Terms] OR ("physical"[All Fields] AND "therapy"[All Fields] AND "modalities"[All Fields]) OR "physical therapy modalities"[All Fields] OR "physiotherapies"[All Fields] OR "physiotherapy"[All Fields]) OR ("therapeutic"[All Fields] OR "therapeutically"[All Fields] OR "therapeutics"[All Fields] OR "therapeutics"[MeSH Terms] OR "therapeutics"[All Fields] OR "therapeutic"[All Fields]) OR ("therapeutics"[MeSH Terms] OR "therapeutics"[All Fields] OR "therapies"[All Fields] OR "therapy"[MeSH Subheading] OR "therapy"[All Fields] OR "therapy s"[All Fields] OR "therapys"[All Fields]) OR ("physiatric"[All Fields] OR "physical and rehabilitation medicine"[MeSH Terms] OR ("physical"[All Fields] AND "rehabilitation"[All Fields] AND "medicine"[All Fields]) OR "physical and rehabilitation medicine"[All Fields] OR "physiatrics"[All Fields]) OR ("physical and rehabilitation medicine"[MeSH Terms] OR ("physical"[All Fields] AND "rehabilitation"[All Fields] AND "medicine"[All Fields]) OR "physical and rehabilitation medicine"[All Fields] OR "physiatry"[All Fields])) |  |  |
|-------------------------------------------------------------------------------------------------------------------------------------------------------------------------------------------------------------------------------------------------------------------------------------------------------------------------------------------------------------------------------------------------------------------------------------------------------------------------------------------------------------------------------------------------------------------------------------------------------------------------------------------------------------------------------------------------------------------------------------------------------------------------------------------------------------------------------------------------------------------------------------------------------------------------------------------------------------------------------------------------------------------------------------------------------------------------------------------------------------------------------------------------------------------------------------------------------------------------------------------------------------------------------------------------------------------------------------------------------------------------------------------------------------------------------------------------------------------------------------------------------------------------------------------------------------------------------------------------------------------------------------------------------------------------------------------------------------------------------------------------------------------------------------------------------------------------------------------------------------------------------------------------------------------------------------------------------------------------------------------------------------------------------------------------------------------------------------------------------------------------------------------------------------------------------------------------------------------------------------------------------------------------------------------------------------------------------------------------------|--|--|

Search was NOT limited to studies.

Search was NOT limited to English.

Embase Searched on November 16, 2020

(Embase searched Embase and Medline via Embase.com)

|                                                                                                                                                                                                                                                                                                                                                                                                                                                                                                                                                                                                                                                                                                                                                                                                                                                                                                                                                                                             |     |     |
|---------------------------------------------------------------------------------------------------------------------------------------------------------------------------------------------------------------------------------------------------------------------------------------------------------------------------------------------------------------------------------------------------------------------------------------------------------------------------------------------------------------------------------------------------------------------------------------------------------------------------------------------------------------------------------------------------------------------------------------------------------------------------------------------------------------------------------------------------------------------------------------------------------------------------------------------------------------------------------------------|-----|-----|
| ('fractur' OR 'fractural' OR 'fracture s' OR (('fractures'/exp OR 'fractures') AND ('bone'/exp OR 'bone')) OR 'bone fractures'/exp OR 'bone fractures' OR 'fracture'/exp OR 'fracture' OR 'fractured' OR 'fractures'/exp OR 'fractures' OR 'fracturing' OR 'break' OR 'breaking' OR 'breakings' OR 'breaks' OR 'broke' OR 'broken' OR 'fractures, bone'/exp OR 'fractures, bone' OR 'fracture healing'/exp OR 'fracture healing' OR 'fracture healings' OR 'healing fracture'/exp OR 'healing fracture') AND ('tibia'/exp OR 'tibia' OR 'tibias' OR 'tibia s' OR 'tibiae' OR 'fibula'/exp OR 'fibula' OR 'fibulas' OR 'fibulae' OR 'femur'/exp OR 'femur' OR 'femurs' OR 'femur s' OR 'femural' OR 'femure' OR 'patella'/exp OR 'patella' OR 'patellas' OR 'patella s' OR 'patellae' OR 'talus'/exp OR 'talus' OR 'calcaneus'/exp OR 'calcaneus' OR 'cuboids' OR 'cuboid' OR ('metatarsal' AND ('bones'/exp OR 'bones')) OR 'metatarsal bones'/exp OR 'metatarsal bones' OR 'metatarsal' OR | 131 | 131 |
|---------------------------------------------------------------------------------------------------------------------------------------------------------------------------------------------------------------------------------------------------------------------------------------------------------------------------------------------------------------------------------------------------------------------------------------------------------------------------------------------------------------------------------------------------------------------------------------------------------------------------------------------------------------------------------------------------------------------------------------------------------------------------------------------------------------------------------------------------------------------------------------------------------------------------------------------------------------------------------------------|-----|-----|

|                                                                                                                                                                                                                                                                                                                                                                                                                                                                                                                                                                                                                                                                                                                                                                                                                                                                                                                                                                                                                                                                                                                                                                                                                                                                                                                                                                                                 |        |  |
|-------------------------------------------------------------------------------------------------------------------------------------------------------------------------------------------------------------------------------------------------------------------------------------------------------------------------------------------------------------------------------------------------------------------------------------------------------------------------------------------------------------------------------------------------------------------------------------------------------------------------------------------------------------------------------------------------------------------------------------------------------------------------------------------------------------------------------------------------------------------------------------------------------------------------------------------------------------------------------------------------------------------------------------------------------------------------------------------------------------------------------------------------------------------------------------------------------------------------------------------------------------------------------------------------------------------------------------------------------------------------------------------------|--------|--|
| <p>'metatarsals' OR 'naviculare' OR 'naviculars' OR ('tarsal' AND ('bones'/exp OR 'bones')) OR 'tarsal bones'/exp OR 'tarsal bones' OR 'navicular' OR (('finger'/exp OR 'finger') AND 'phalanges') OR 'finger phalanges'/exp OR 'finger phalanges' OR 'phalanx'/exp OR 'phalanx' OR 'phalanxes' OR 'cuneiform' OR 'cuneiforme' OR 'cuneiforms' OR 'ischium'/exp OR 'ischium' OR 'tibiofibular') AND (('progressive' OR 'progress' OR 'progression' OR 'progressively' OR 'progressing' OR 'continuous' OR 'continuously' OR 'increase' OR 'increasing' OR 'increased' OR 'growing' OR 'escalating' OR 'escalate' OR 'escalated' OR 'escalation' OR 'accelerating' OR 'accelerate' OR 'accelerated' OR 'acceleration' OR 'accelerations' OR 'intesified' OR 'intensification' OR 'intensifications' OR 'intensifying' OR 'gradual' OR 'gradually' OR 'gradient' OR 'gradation' OR 'advancing' OR 'rising' OR 'mounting' OR 'graduated' OR 'titrated' OR 'titrate' OR 'titration' OR 'incremented' OR 'incrementing' OR 'increments' OR 'increment' OR 'incremental' OR 'incrementally') NEAR/2 ('weight bearing' OR 'resistance training' OR 'axial loading'))</p>                                                                                                                                                                                                                               |        |  |
| <p>('progressive' OR 'progress' OR 'progression' OR 'progressively' OR 'progressing' OR 'continuous' OR 'continuously' OR 'increase' OR 'increasing' OR 'increased' OR 'growing' OR 'escalating' OR 'escalate' OR 'escalated' OR 'escalation' OR 'accelerating' OR 'accelerate' OR 'accelerated' OR 'acceleration' OR 'accelerations' OR 'intesified' OR 'intensification' OR 'intensifications' OR 'intensifying' OR 'gradual' OR 'gradually' OR 'gradient' OR 'gradation' OR 'advancing' OR 'rising' OR 'mounting' OR 'graduated' OR 'titrated' OR 'titrate' OR 'titration' OR 'incremented' OR 'incrementing' OR 'increments' OR 'increment' OR 'incremental' OR 'incrementally') NEAR/2 ('weight bearing' OR 'resistance training' OR 'axial loading')</p>                                                                                                                                                                                                                                                                                                                                                                                                                                                                                                                                                                                                                                  | 1696   |  |
| <p>('fractur' OR 'fractural' OR 'fracture s' OR (('fractures'/exp OR 'fractures') AND ('bone'/exp OR 'bone')) OR 'bone fractures'/exp OR 'bone fractures' OR 'fracture'/exp OR 'fracture' OR 'fractured' OR 'fractures'/exp OR 'fractures' OR 'fracturing' OR 'break' OR 'breaking' OR 'breakings' OR 'breaks' OR 'broke' OR 'broken' OR 'fractures, bone'/exp OR 'fractures, bone' OR 'fracture healing'/exp OR 'fracture healing' OR 'fracture healings' OR 'healing fracture'/exp OR 'healing fracture') AND ('tibia'/exp OR 'tibia' OR 'tibias' OR 'tibia s' OR 'tibiae' OR 'fibula'/exp OR 'fibula' OR 'fibulas' OR 'fibulae' OR 'femur'/exp OR 'femur' OR 'femurs' OR 'femur s' OR 'femural' OR 'femure' OR 'patella'/exp OR 'patella' OR 'patellas' OR 'patella s' OR 'patellae' OR 'talus'/exp OR 'talus' OR 'calcaneus'/exp OR 'calcaneus' OR 'cuboids' OR 'cuboid' OR ('metatarsal' AND ('bones'/exp OR 'bones')) OR 'metatarsal bones'/exp OR 'metatarsal bones' OR 'metatarsal' OR 'metatarsals' OR 'naviculare' OR 'naviculars' OR ('tarsal' AND ('bones'/exp OR 'bones')) OR 'tarsal bones'/exp OR 'tarsal bones' OR 'navicular' OR (('finger'/exp OR 'finger') AND 'phalanges') OR 'finger phalanges'/exp OR 'finger phalanges' OR 'phalanx'/exp OR 'phalanx' OR 'phalanxes' OR 'cuneiform' OR 'cuneiforme' OR 'cuneiforms' OR 'ischium'/exp OR 'ischium' OR 'tibiofibular')</p> | 101476 |  |

Search was NOT limited to studies.  
Search was NOT limited to English.

Web of Science searched on November 16, 2020  
(Web of Science searched Science Citation Index-Expanded)







|                                                                                                                                                                                                                                                                                                                                                                                                                                                                                                                                                                                                                                                                                                                                                                                                                                                                                                                                     |  |  |
|-------------------------------------------------------------------------------------------------------------------------------------------------------------------------------------------------------------------------------------------------------------------------------------------------------------------------------------------------------------------------------------------------------------------------------------------------------------------------------------------------------------------------------------------------------------------------------------------------------------------------------------------------------------------------------------------------------------------------------------------------------------------------------------------------------------------------------------------------------------------------------------------------------------------------------------|--|--|
| OR "increasing" OR "increased" OR "growing" OR "escalating" OR "escalate" OR "escalated" OR "escalation" OR "accelerating" OR "accelerate" OR "accelerated" OR "acceleration" OR "accelerations" OR "rising" OR "intensified" OR ("intensification" OR "intensifications") OR "intensifying" OR "gradual" OR "gradually" OR "gradation" OR "gradient" OR "gradation" OR "advancing" OR "rising" OR "mounting" OR "graduated" OR "titrated" OR "titrate" OR "titration" OR ("increment" OR "incremented" OR "incrementing" OR "increments") OR "increment" OR "incremental" OR "incrementally") AND ("weight bearing" OR "weight bearing" OR "weight bearing" OR ("weight bearing" OR "weight bearing" OR "weightbearing" OR "weightbear") OR ("weight bearing" OR "weight bearing" OR "loadbearing") OR "load bearing" OR "load bearing" OR "Axial Loading" OR "Axial Loadings"))<br><i>Indexes=SCI-EXPANDED Timespan=All years</i> |  |  |
|-------------------------------------------------------------------------------------------------------------------------------------------------------------------------------------------------------------------------------------------------------------------------------------------------------------------------------------------------------------------------------------------------------------------------------------------------------------------------------------------------------------------------------------------------------------------------------------------------------------------------------------------------------------------------------------------------------------------------------------------------------------------------------------------------------------------------------------------------------------------------------------------------------------------------------------|--|--|

Search was NOT limited to studies.  
Search was NOT limited to English.

Cochrane Reviews (Cochrane Database of Systematic Reviews) searched on November 16, 2020

|                                                                                                |     |   |
|------------------------------------------------------------------------------------------------|-----|---|
| ("progressive weight bearing"):ti,ab,kw AND (fracture):ti,ab,kw AND (leg OR leg bone):ti,ab,kw | 0   | 0 |
| Leg OR leg bone                                                                                | 368 |   |
| fracture                                                                                       | 233 |   |
| "progressive weight bearing"                                                                   | 0   |   |

Search was NOT limited to studies.  
Search was NOT limited to English only.

CENTRAL (Cochrane Central Register of Controlled Trials) searched on November 16, 2020  
(CENTRAL searched PubMed, Embase, ICTRP, ClinicalTrials.gov, and CINAHL)

|                                                                                                |       |   |
|------------------------------------------------------------------------------------------------|-------|---|
| ("progressive weight bearing"):ti,ab,kw AND (fracture):ti,ab,kw AND (leg OR leg bone):ti,ab,kw | 1     | 1 |
| Leg OR leg bone                                                                                | 24988 |   |
| fracture                                                                                       | 24495 |   |
| "progressive weight bearing"                                                                   | 0     |   |

WoS: *Timespan: 2020-11-17 to 2022-01-18 (Index Date)*

<https://www.webofscience.com/wos/woscc/summary/885430e9-c8ab-4b63-b3a0-7ae876c3ce5f-1f7df9c6/date-descending/1>

PubMed Searched on January 18, 2022

(Pubmed searched via <https://pubmed.ncbi.nlm.nih.gov/>) (PubMed: Results were manually searched because, when date limited, only 55 citations appeared. It should have been 82, and, in fact, when compared to the first search results, the 82 newest were not matched.)

|                                                                                                                                                                                                      |     |     |
|------------------------------------------------------------------------------------------------------------------------------------------------------------------------------------------------------|-----|-----|
| ("progressive"[Title/Abstract] OR "progress"[Title/Abstract] OR "progression"[Title/Abstract] OR "progressively"[Title/Abstract] OR "progressing"[Title/Abstract] OR "continuous"[Title/Abstract] OR | 942 | 942 |
|------------------------------------------------------------------------------------------------------------------------------------------------------------------------------------------------------|-----|-----|

|                                                                                                                                                                                                                                                                                                                                                                                                                                                                                                                                                                                                                                                                                                                                                                                                                                                                                                                                                                                                                                                                                                                                                                                                                                                                                                                                                                                                                                                                                                                                                                                                                                                                                                                                                                                                                                                                                                                                                                                                                                                                                                                                                                                                                                                                                                                                                                                                                                                                                                                                                                                                                                                                                                                                                                                                                                                                                                                                                                                                                                                                                                                                                                                                                                                                                                                                                                                                                                                                                                                                                                                                                                                                                                                                               |  |  |
|-----------------------------------------------------------------------------------------------------------------------------------------------------------------------------------------------------------------------------------------------------------------------------------------------------------------------------------------------------------------------------------------------------------------------------------------------------------------------------------------------------------------------------------------------------------------------------------------------------------------------------------------------------------------------------------------------------------------------------------------------------------------------------------------------------------------------------------------------------------------------------------------------------------------------------------------------------------------------------------------------------------------------------------------------------------------------------------------------------------------------------------------------------------------------------------------------------------------------------------------------------------------------------------------------------------------------------------------------------------------------------------------------------------------------------------------------------------------------------------------------------------------------------------------------------------------------------------------------------------------------------------------------------------------------------------------------------------------------------------------------------------------------------------------------------------------------------------------------------------------------------------------------------------------------------------------------------------------------------------------------------------------------------------------------------------------------------------------------------------------------------------------------------------------------------------------------------------------------------------------------------------------------------------------------------------------------------------------------------------------------------------------------------------------------------------------------------------------------------------------------------------------------------------------------------------------------------------------------------------------------------------------------------------------------------------------------------------------------------------------------------------------------------------------------------------------------------------------------------------------------------------------------------------------------------------------------------------------------------------------------------------------------------------------------------------------------------------------------------------------------------------------------------------------------------------------------------------------------------------------------------------------------------------------------------------------------------------------------------------------------------------------------------------------------------------------------------------------------------------------------------------------------------------------------------------------------------------------------------------------------------------------------------------------------------------------------------------------------------------------------|--|--|
| <p> "continuously"[Title/Abstract] OR "increase"[Title/Abstract] OR<br/> "increasing"[Title/Abstract] OR "increased"[Title/Abstract] OR<br/> "growing"[Title/Abstract] OR "escalating"[Title/Abstract] OR<br/> "escalate"[Title/Abstract] OR "escalated"[Title/Abstract] OR<br/> "escalation"[Title/Abstract] OR "accelerating"[Title/Abstract] OR<br/> "accelerate"[Title/Abstract] OR "accelerated"[Title/Abstract] OR<br/> "acceleration"[Title/Abstract] OR "accelerations"[Title/Abstract] OR<br/> "rising"[Title/Abstract] OR "intesified"[Title/Abstract] OR<br/> ("intensification"[All Fields] OR "intensifications"[All Fields]) OR<br/> "intensifying"[Title/Abstract] OR "gradual"[Title/Abstract] OR<br/> "gradually"[Title/Abstract] OR "gradation"[Title/Abstract] OR<br/> "gradient"[Title/Abstract] OR "gradation"[Title/Abstract] OR<br/> "advancing"[Title/Abstract] OR "rising"[Title/Abstract] OR<br/> "mounting"[Title/Abstract] OR "graduated"[Title/Abstract] OR<br/> "titrated"[Title/Abstract] OR "titrate"[Title/Abstract] OR<br/> "titration"[Title/Abstract] OR ("increment"[All Fields] OR<br/> "incremented"[All Fields] OR "incrementing"[All Fields] OR<br/> "increments"[All Fields]) OR "increment"[Title/Abstract] OR<br/> "incremental"[Title/Abstract] OR "incrementally"[Title/Abstract]) AND<br/> ("weight bearing"[MeSH Terms] OR "weight bearing"[All Fields] OR<br/> "weight bearing"[All Fields] OR ("weight bearing"[MeSH Terms] OR<br/> "weight bearing"[All Fields] OR "weightbearing"[All Fields] OR<br/> "weightbear"[All Fields]) OR ("weight bearing"[MeSH Terms] OR<br/> "weight bearing"[All Fields] OR "loadbearing"[All Fields]) OR "load<br/> bearing"[All Fields] OR "load bearing"[All Fields] OR "Axial Loading"[All<br/> Fields] OR "Axial Loadings"[All Fields] OR ("weight s"[All Fields] OR<br/> "weighted"[All Fields] OR "weighting"[All Fields] OR "weightings"[All<br/> Fields] OR "weights and measures"[MeSH Terms] OR ("weights"[All<br/> Fields] AND "measures"[All Fields]) OR "weights and measures"[All<br/> Fields] OR "weight"[All Fields] OR "body weight"[MeSH Terms] OR<br/> ("body"[All Fields] AND "weight"[All Fields]) OR "body weight"[All Fields]<br/> OR "weights"[All Fields]) AND "bear*"[All Fields])) AND<br/> ("exercise"[MeSH Terms] OR "exercise"[All Fields] OR "exercises"[All<br/> Fields] OR "exercise therapy"[MeSH Terms] OR ("exercise"[All Fields]<br/> AND "therapy"[All Fields]) OR "exercise therapy"[All Fields] OR<br/> "exercise s"[All Fields] OR "exercised"[All Fields] OR "exerciser"[All<br/> Fields] OR "exercisers"[All Fields] OR "exercising"[All Fields] OR<br/> ("exercise"[MeSH Terms] OR "exercise"[All Fields] OR "exercises"[All<br/> Fields] OR "exercise therapy"[MeSH Terms] OR ("exercise"[All Fields]<br/> AND "therapy"[All Fields]) OR "exercise therapy"[All Fields] OR<br/> "exercise s"[All Fields] OR "exercised"[All Fields] OR "exerciser"[All<br/> Fields] OR "exercisers"[All Fields] OR "exercising"[All Fields]) OR<br/> "exercised"[All Fields] OR ("clinical protocols"[MeSH Terms] OR<br/> ("clinical"[All Fields] AND "protocols"[All Fields]) OR "clinical<br/> protocols"[All Fields] OR "regimen"[All Fields] OR "regimen s"[All Fields]<br/> OR "regimens"[All Fields]) OR ("physical examination"[MeSH Terms]<br/> OR ("physical"[All Fields] AND "examination"[All Fields]) OR "physical<br/> examination"[All Fields] OR "physical"[All Fields] OR "physically"[All<br/> Fields] OR "physicals"[All Fields]) AND ("therapeutics"[MeSH Terms]<br/> OR "therapeutics"[All Fields] OR "therapies"[All Fields] OR<br/> "therapy"[MeSH Subheading] OR "therapy"[All Fields] OR "therapy </p> |  |  |
|-----------------------------------------------------------------------------------------------------------------------------------------------------------------------------------------------------------------------------------------------------------------------------------------------------------------------------------------------------------------------------------------------------------------------------------------------------------------------------------------------------------------------------------------------------------------------------------------------------------------------------------------------------------------------------------------------------------------------------------------------------------------------------------------------------------------------------------------------------------------------------------------------------------------------------------------------------------------------------------------------------------------------------------------------------------------------------------------------------------------------------------------------------------------------------------------------------------------------------------------------------------------------------------------------------------------------------------------------------------------------------------------------------------------------------------------------------------------------------------------------------------------------------------------------------------------------------------------------------------------------------------------------------------------------------------------------------------------------------------------------------------------------------------------------------------------------------------------------------------------------------------------------------------------------------------------------------------------------------------------------------------------------------------------------------------------------------------------------------------------------------------------------------------------------------------------------------------------------------------------------------------------------------------------------------------------------------------------------------------------------------------------------------------------------------------------------------------------------------------------------------------------------------------------------------------------------------------------------------------------------------------------------------------------------------------------------------------------------------------------------------------------------------------------------------------------------------------------------------------------------------------------------------------------------------------------------------------------------------------------------------------------------------------------------------------------------------------------------------------------------------------------------------------------------------------------------------------------------------------------------------------------------------------------------------------------------------------------------------------------------------------------------------------------------------------------------------------------------------------------------------------------------------------------------------------------------------------------------------------------------------------------------------------------------------------------------------------------------------------------------|--|--|

|                                                                                                                                                                                                                                                                                                                                                                                                                                                                                                                                                                                                                                                                                                                                                                                                                                                                                                                                                                                                                                                                                                                                                                                                                                                                                                                                                                                                                                                                                                                                                                                                                                                                                                                                                                                                                                                                                                                                                                                                                                                                                                                                                                                                                                                                                                                                                                                                                                                                                                                                                                                                                                                                                                                                                                                                                                                                                                                                                                                                                                                                                                                                                                                                                                                                                                                                                                                                                                                                                                                                                                                                                                                                                                                                                                                                                                |  |  |
|--------------------------------------------------------------------------------------------------------------------------------------------------------------------------------------------------------------------------------------------------------------------------------------------------------------------------------------------------------------------------------------------------------------------------------------------------------------------------------------------------------------------------------------------------------------------------------------------------------------------------------------------------------------------------------------------------------------------------------------------------------------------------------------------------------------------------------------------------------------------------------------------------------------------------------------------------------------------------------------------------------------------------------------------------------------------------------------------------------------------------------------------------------------------------------------------------------------------------------------------------------------------------------------------------------------------------------------------------------------------------------------------------------------------------------------------------------------------------------------------------------------------------------------------------------------------------------------------------------------------------------------------------------------------------------------------------------------------------------------------------------------------------------------------------------------------------------------------------------------------------------------------------------------------------------------------------------------------------------------------------------------------------------------------------------------------------------------------------------------------------------------------------------------------------------------------------------------------------------------------------------------------------------------------------------------------------------------------------------------------------------------------------------------------------------------------------------------------------------------------------------------------------------------------------------------------------------------------------------------------------------------------------------------------------------------------------------------------------------------------------------------------------------------------------------------------------------------------------------------------------------------------------------------------------------------------------------------------------------------------------------------------------------------------------------------------------------------------------------------------------------------------------------------------------------------------------------------------------------------------------------------------------------------------------------------------------------------------------------------------------------------------------------------------------------------------------------------------------------------------------------------------------------------------------------------------------------------------------------------------------------------------------------------------------------------------------------------------------------------------------------------------------------------------------------------------------------|--|--|
| <p>s"[All Fields] OR "therapys"[All Fields] OR ("medicin"[All Fields] OR "medicinal"[All Fields] OR "medicinally"[All Fields] OR "medicinals"[All Fields] OR "medicine"[MeSH Terms] OR "medicine"[All Fields] OR "medicine s"[All Fields] OR "medicines"[All Fields]) OR ("rehabilitation"[MeSH Terms] OR "rehabilitation"[All Fields] OR "rehab"[All Fields] OR "rehab[s]"[All Fields]) OR ("rehabilitant"[All Fields] OR "rehabilitants"[All Fields] OR "rehabilitate"[All Fields] OR "rehabilitated"[All Fields] OR "rehabilitates"[All Fields] OR "rehabilitating"[All Fields] OR "rehabilitation"[MeSH Terms] OR "rehabilitation"[All Fields] OR "rehabilitations"[All Fields] OR "rehabilitative"[All Fields] OR "rehabilitation"[MeSH Subheading] OR "rehabilitation s"[All Fields] OR "rehabilitational"[All Fields] OR "rehabilitator"[All Fields] OR "rehabilitators"[All Fields])) OR ("physical therapy modalities"[MeSH Terms] OR ("physical"[All Fields] AND "therapy"[All Fields] AND "modalities"[All Fields]) OR "physical therapy modalities"[All Fields] OR "physiotherapies"[All Fields] OR "physiotherapy"[All Fields]) OR ("physical therapy modalities"[MeSH Terms] OR ("physical"[All Fields] AND "therapy"[All Fields] AND "modalities"[All Fields]) OR "physical therapy modalities"[All Fields] OR "physiotherapies"[All Fields] OR "physiotherapy"[All Fields]) OR ("therapeutical"[All Fields] OR "therapeutically"[All Fields] OR "therapeutics"[All Fields] OR "therapeutics"[MeSH Terms] OR "therapeutics"[All Fields] OR "therapies"[All Fields] OR "therapy"[MeSH Subheading] OR "therapy"[All Fields] OR "therapy s"[All Fields] OR "therapys"[All Fields]) OR ("physiatric"[All Fields] OR "physical and rehabilitation medicine"[MeSH Terms] OR ("physical"[All Fields] AND "rehabilitation"[All Fields] AND "medicine"[All Fields]) OR "physical and rehabilitation medicine"[All Fields] OR "physiatrics"[All Fields]) OR ("physical and rehabilitation medicine"[MeSH Terms] OR ("physical"[All Fields] AND "rehabilitation"[All Fields] AND "medicine"[All Fields]) OR "physical and rehabilitation medicine"[All Fields] OR "physiatry"[All Fields])) AND ((("fractur"[All Fields] OR "fractural"[All Fields] OR "fracture s"[All Fields] OR "fractures, bone"[MeSH Terms] OR ("fractures"[All Fields] AND "bone"[All Fields]) OR "bone fractures"[All Fields] OR "fracture"[All Fields] OR "fractured"[All Fields] OR "fractures"[All Fields] OR "fracturing"[All Fields] OR ("fractur"[All Fields] OR "fractural"[All Fields] OR "fracture s"[All Fields] OR "fractures, bone"[MeSH Terms] OR ("fractures"[All Fields] AND "bone"[All Fields]) OR "bone fractures"[All Fields] OR "fracture"[All Fields] OR "fractured"[All Fields] OR "fractures"[All Fields] OR "fracturing"[All Fields]) OR ("break"[All Fields] OR "breaking"[All Fields] OR "breakings"[All Fields] OR "breaks"[All Fields]) OR "broke"[All Fields] OR "broken"[All Fields] OR "fractures, bone"[MeSH Terms] OR "Fracture Healing"[MeSH Terms] OR "Fracture Healings"[All Fields] OR "healing fracture"[All Fields]) AND ("tibia"[MeSH Terms] OR "tibia"[All Fields] OR "tibias"[All Fields] OR "tibia s"[All Fields] OR "tibiae"[All Fields] OR ("fibula"[MeSH Terms] OR "fibula"[All Fields] OR "fibulas"[All Fields] OR "fibulae"[All Fields]) OR ("femur"[MeSH Terms] OR "femur"[All Fields] OR "femurs"[All Fields] OR "femur s"[All Fields] OR "femural"[All Fields] OR "femure"[All Fields]) OR ("patella"[MeSH Terms] OR "patella"[All Fields] OR "patellas"[All Fields] OR "patella s"[All Fields] OR "patellae"[All Fields]) OR ("talus"[MeSH Terms] OR "talus"[All Fields]) OR ("calcaneus"[MeSH Terms] OR "calcaneus"[All Fields]) OR ("cuboids"[All Fields] OR "tarsal bones"[MeSH Terms] OR</p> |  |  |
|--------------------------------------------------------------------------------------------------------------------------------------------------------------------------------------------------------------------------------------------------------------------------------------------------------------------------------------------------------------------------------------------------------------------------------------------------------------------------------------------------------------------------------------------------------------------------------------------------------------------------------------------------------------------------------------------------------------------------------------------------------------------------------------------------------------------------------------------------------------------------------------------------------------------------------------------------------------------------------------------------------------------------------------------------------------------------------------------------------------------------------------------------------------------------------------------------------------------------------------------------------------------------------------------------------------------------------------------------------------------------------------------------------------------------------------------------------------------------------------------------------------------------------------------------------------------------------------------------------------------------------------------------------------------------------------------------------------------------------------------------------------------------------------------------------------------------------------------------------------------------------------------------------------------------------------------------------------------------------------------------------------------------------------------------------------------------------------------------------------------------------------------------------------------------------------------------------------------------------------------------------------------------------------------------------------------------------------------------------------------------------------------------------------------------------------------------------------------------------------------------------------------------------------------------------------------------------------------------------------------------------------------------------------------------------------------------------------------------------------------------------------------------------------------------------------------------------------------------------------------------------------------------------------------------------------------------------------------------------------------------------------------------------------------------------------------------------------------------------------------------------------------------------------------------------------------------------------------------------------------------------------------------------------------------------------------------------------------------------------------------------------------------------------------------------------------------------------------------------------------------------------------------------------------------------------------------------------------------------------------------------------------------------------------------------------------------------------------------------------------------------------------------------------------------------------------------------|--|--|

|                                                                                                                                                                                                                                                                                                                                                                                                                                                                                                                                                                                                                                                                                                                                                                                                                                                       |  |  |
|-------------------------------------------------------------------------------------------------------------------------------------------------------------------------------------------------------------------------------------------------------------------------------------------------------------------------------------------------------------------------------------------------------------------------------------------------------------------------------------------------------------------------------------------------------------------------------------------------------------------------------------------------------------------------------------------------------------------------------------------------------------------------------------------------------------------------------------------------------|--|--|
| ("tarsal"[All Fields] AND "bones"[All Fields]) OR "tarsal bones"[All Fields] OR "cuboid"[All Fields]) OR ("metatarsal bones"[MeSH Terms] OR ("metatarsal"[All Fields] AND "bones"[All Fields]) OR "metatarsal bones"[All Fields] OR "metatarsal"[All Fields] OR "metatarsals"[All Fields]) OR ("naviculare"[All Fields] OR "naviculars"[All Fields] OR "tarsal bones"[MeSH Terms] OR ("tarsal"[All Fields] AND "bones"[All Fields]) OR "tarsal bones"[All Fields] OR "navicular"[All Fields]) OR ("finger phalanges"[MeSH Terms] OR ("finger"[All Fields] AND "phalanges"[All Fields]) OR "finger phalanges"[All Fields] OR "phalanx"[All Fields] OR "phalanxes"[All Fields]) OR ("cuneiform"[All Fields] OR "cuneiforme"[All Fields] OR "cuneiforms"[All Fields]) OR ("ischium"[MeSH Terms] OR "ischium"[All Fields]) OR "tibiofibular"[All Fields]) |  |  |
|-------------------------------------------------------------------------------------------------------------------------------------------------------------------------------------------------------------------------------------------------------------------------------------------------------------------------------------------------------------------------------------------------------------------------------------------------------------------------------------------------------------------------------------------------------------------------------------------------------------------------------------------------------------------------------------------------------------------------------------------------------------------------------------------------------------------------------------------------------|--|--|

Embase Searched on January 18, 2022

(Embase searched Embase, Medline, and Preprints via Embase.com)

|                                                                                                                                                                                                                                                                                                                                                                                                                                                                                                                                                                                                                                                                                                                                                                                                                                                                                                                                                                                                                                                                                                                                                                                                                                                                                                                                                                                                                                                                                                                                                                                                                                                                                                                                                                                                                                                                                                                                                                                                                                                                                                                                                                                                    |     |    |
|----------------------------------------------------------------------------------------------------------------------------------------------------------------------------------------------------------------------------------------------------------------------------------------------------------------------------------------------------------------------------------------------------------------------------------------------------------------------------------------------------------------------------------------------------------------------------------------------------------------------------------------------------------------------------------------------------------------------------------------------------------------------------------------------------------------------------------------------------------------------------------------------------------------------------------------------------------------------------------------------------------------------------------------------------------------------------------------------------------------------------------------------------------------------------------------------------------------------------------------------------------------------------------------------------------------------------------------------------------------------------------------------------------------------------------------------------------------------------------------------------------------------------------------------------------------------------------------------------------------------------------------------------------------------------------------------------------------------------------------------------------------------------------------------------------------------------------------------------------------------------------------------------------------------------------------------------------------------------------------------------------------------------------------------------------------------------------------------------------------------------------------------------------------------------------------------------|-----|----|
| ('fractur' OR 'fractural' OR 'fracture s' OR (('fractures'/exp OR 'fractures') AND ('bone'/exp OR 'bone'))) OR 'bone fractures'/exp OR 'bone fractures' OR 'fracture'/exp OR 'fracture' OR 'fractured' OR 'fractures'/exp OR 'fractures' OR 'fracturing' OR 'break' OR 'breaking' OR 'breakings' OR 'breaks' OR 'broke' OR 'broken' OR 'fractures, bone'/exp OR 'fractures, bone' OR 'fracture healing'/exp OR 'fracture healing' OR 'fracture healings' OR 'healing fracture'/exp OR 'healing fracture') AND ('tibia'/exp OR 'tibia' OR 'tibias' OR 'tibia s' OR 'tibiae' OR 'fibula'/exp OR 'fibula' OR 'fibulas' OR 'fibulae' OR 'femur'/exp OR 'femur' OR 'femurs' OR 'femur s' OR 'femural' OR 'femure' OR 'patella'/exp OR 'patella' OR 'patellas' OR 'patella s' OR 'patellae' OR 'talus'/exp OR 'talus' OR 'calcaneus'/exp OR 'calcaneus' OR 'cuboids' OR 'cuboid' OR ('metatarsal' AND ('bones'/exp OR 'bones'))) OR 'metatarsal bones'/exp OR 'metatarsal bones' OR 'metatarsal' OR 'metatarsals' OR 'naviculare' OR 'naviculars' OR ('tarsal' AND ('bones'/exp OR 'bones'))) OR 'tarsal bones'/exp OR 'tarsal bones' OR 'navicular' OR (('finger'/exp OR 'finger') AND 'phalanges') OR 'finger phalanges'/exp OR 'finger phalanges' OR 'phalanx'/exp OR 'phalanx' OR 'phalanxes' OR 'cuneiform' OR 'cuneiforme' OR 'cuneiforms' OR 'ischium'/exp OR 'ischium' OR 'tibiofibular') AND (('progressive' OR 'progress' OR 'progression' OR 'progressively' OR 'progressing' OR 'continuous' OR 'continuously' OR 'increase' OR 'increasing' OR 'increased' OR 'growing' OR 'escalating' OR 'escalate' OR 'escalated' OR 'escalation' OR 'accelerating' OR 'accelerate' OR 'accelerated' OR 'acceleration' OR 'accelerations' OR 'intensified' OR 'intensification' OR 'intensifications' OR 'intensifying' OR 'gradual' OR 'gradually' OR 'gradient' OR 'gradation' OR 'advancing' OR 'rising' OR 'mounting' OR 'graduated' OR 'titrated' OR 'titrate' OR 'titration' OR 'incremented' OR 'incrementing' OR 'increments' OR 'increment' OR 'incremental' OR 'incrementally') NEAR/2 ('weight bearing' OR 'resistance training' OR 'axial loading')) AND [17-11-2020]/sd NOT [19-01-2022]/sd | 14  | 14 |
| ('fractur' OR 'fractural' OR 'fracture s' OR (('fractures'/exp OR 'fractures') AND ('bone'/exp OR 'bone'))) OR 'bone fractures'/exp OR 'bone fractures' OR 'fracture'/exp OR 'fracture' OR 'fractured' OR 'fractures'/exp OR 'fractures' OR 'fracturing' OR 'break' OR 'breaking' OR 'breakings' OR 'breaks' OR 'broke' OR 'broken' OR 'fractures, bone'/exp OR 'fractures, bone' OR 'fracture healing'/exp OR 'fracture                                                                                                                                                                                                                                                                                                                                                                                                                                                                                                                                                                                                                                                                                                                                                                                                                                                                                                                                                                                                                                                                                                                                                                                                                                                                                                                                                                                                                                                                                                                                                                                                                                                                                                                                                                           | 141 |    |

|                                                                                                                                                                                                                                                                                                                                                                                                                                                                                                                                                                                                                                                                                                                                                                                                                                                                                                                                                                                                                                                                                                                                                                                                                                                                                                                                                                                                                                                                                                                                                                                                                                                                                                                                 |  |  |
|---------------------------------------------------------------------------------------------------------------------------------------------------------------------------------------------------------------------------------------------------------------------------------------------------------------------------------------------------------------------------------------------------------------------------------------------------------------------------------------------------------------------------------------------------------------------------------------------------------------------------------------------------------------------------------------------------------------------------------------------------------------------------------------------------------------------------------------------------------------------------------------------------------------------------------------------------------------------------------------------------------------------------------------------------------------------------------------------------------------------------------------------------------------------------------------------------------------------------------------------------------------------------------------------------------------------------------------------------------------------------------------------------------------------------------------------------------------------------------------------------------------------------------------------------------------------------------------------------------------------------------------------------------------------------------------------------------------------------------|--|--|
| healing' OR 'fracture healings' OR 'healing fracture'/exp OR 'healing fracture') AND ('tibia'/exp OR 'tibia' OR 'tibias' OR 'tibia s' OR 'tibiae' OR 'fibula'/exp OR 'fibula' OR 'fibulas' OR 'fibulae' OR 'femur'/exp OR 'femur' OR 'femurs' OR 'femur s' OR 'femural' OR 'femure' OR 'patella'/exp OR 'patella' OR 'patellas' OR 'patella s' OR 'patellae' OR 'talus'/exp OR 'talus' OR 'calcaneus'/exp OR 'calcaneus' OR 'cuboids' OR 'cuboid' OR ('metatarsal' AND ('bones'/exp OR 'bones')) OR 'metatarsal bones'/exp OR 'metatarsal bones' OR 'metatarsal' OR 'metatarsals' OR 'naviculare' OR 'naviculars' OR ('tarsal' AND ('bones'/exp OR 'bones')) OR 'tarsal bones'/exp OR 'tarsal bones' OR 'navicular' OR (('finger'/exp OR 'finger') AND 'phalanges') OR 'finger phalanges'/exp OR 'finger phalanges' OR 'phalanx'/exp OR 'phalanx' OR 'phalanxes' OR 'cuneiform' OR 'cuneiforme' OR 'cuneiforms' OR 'ischium'/exp OR 'ischium' OR 'tibiofibular') AND (('progressive' OR 'progress' OR 'progression' OR 'progressively' OR 'progressing' OR 'continuous' OR 'continuously' OR 'increase' OR 'increasing' OR 'increased' OR 'growing' OR 'escalating' OR 'escalate' OR 'escalated' OR 'escalation' OR 'accelerating' OR 'accelerate' OR 'accelerated' OR 'acceleration' OR 'accelerations' OR 'intensified' OR 'intensification' OR 'intensifications' OR 'intensifying' OR 'gradual' OR 'gradually' OR 'gradient' OR 'gradation' OR 'advancing' OR 'rising' OR 'mounting' OR 'graduated' OR 'titrated' OR 'titrate' OR 'titration' OR 'incremented' OR 'incrementing' OR 'increments' OR 'increment' OR 'incremental' OR 'incrementally') NEAR/2 ('weight bearing' OR 'resistance training' OR 'axial loading')) |  |  |
|---------------------------------------------------------------------------------------------------------------------------------------------------------------------------------------------------------------------------------------------------------------------------------------------------------------------------------------------------------------------------------------------------------------------------------------------------------------------------------------------------------------------------------------------------------------------------------------------------------------------------------------------------------------------------------------------------------------------------------------------------------------------------------------------------------------------------------------------------------------------------------------------------------------------------------------------------------------------------------------------------------------------------------------------------------------------------------------------------------------------------------------------------------------------------------------------------------------------------------------------------------------------------------------------------------------------------------------------------------------------------------------------------------------------------------------------------------------------------------------------------------------------------------------------------------------------------------------------------------------------------------------------------------------------------------------------------------------------------------|--|--|

Web of Science searched on January 18, 2022  
(Web of Science searched Science Citation Index-Expanded)

|                                                                                                                                                                                                                                                                                                                                                                                                                                                                                                                                                                                                                                                                                                                                                                                                                                                                                                                                                                                                                                                                                                                                                                                                                                                              |   |   |
|--------------------------------------------------------------------------------------------------------------------------------------------------------------------------------------------------------------------------------------------------------------------------------------------------------------------------------------------------------------------------------------------------------------------------------------------------------------------------------------------------------------------------------------------------------------------------------------------------------------------------------------------------------------------------------------------------------------------------------------------------------------------------------------------------------------------------------------------------------------------------------------------------------------------------------------------------------------------------------------------------------------------------------------------------------------------------------------------------------------------------------------------------------------------------------------------------------------------------------------------------------------|---|---|
| TS= ("exercise" OR "exercise" OR "exercises" OR "exercise therapy" OR "exercise" AND "therapy") OR "exercise therapy" OR "exercise s" OR "exercised" OR "exerciser" OR "exercisers" OR "exercising" OR ("exercise" OR "exercise" OR "exercises" OR "exercise therapy" OR ("exercise" AND "therapy") OR "exercise therapy" OR "exercise s" OR "exercised" OR "exerciser" OR "exercisers" OR "exercising") OR ("exercise" OR "exercise" OR "exercises" OR "exercise therapy" OR ("exercise" AND "therapy") OR "exercise therapy" OR "exercise s" OR "exercised" OR "exerciser" OR "exercisers" OR "exercising") OR "exercised" OR ("clinical protocols" OR ("clinical" AND "protocols") OR "clinical protocols" OR "regimen" OR "regimen s" OR "regimens") OR ("physical examination" OR ("physical" AND "examination") OR "physical examination" OR "physical" OR "physically" OR "physicals") AND ("therapeutics" OR "therapeutics" OR "therapies" OR "therapy" OR "therapy" OR "therapy s" OR "therapys" OR ("medicine" OR "medicinal" OR "medicinally" OR "medicinals" OR "medicine" OR "medicine" OR "medicine s" OR "medicines") OR ("rehabilitation" OR "rehabilitation" OR "rehab" OR "rehab") OR ("rehabilitant" OR "rehabilitants" OR "rehabilitate" | 9 | 9 |
|--------------------------------------------------------------------------------------------------------------------------------------------------------------------------------------------------------------------------------------------------------------------------------------------------------------------------------------------------------------------------------------------------------------------------------------------------------------------------------------------------------------------------------------------------------------------------------------------------------------------------------------------------------------------------------------------------------------------------------------------------------------------------------------------------------------------------------------------------------------------------------------------------------------------------------------------------------------------------------------------------------------------------------------------------------------------------------------------------------------------------------------------------------------------------------------------------------------------------------------------------------------|---|---|

|                                                                                                                                                                                                                                                                                                                                                                                                                                                                                                                                                                                                                                                                                                                                                                                                                                                                                                                                                                                                                                                                                                                                                                                                                                                                                                                                                                                                                                                                                                                                                                                                                                                                                                                                                                                                                                                                                                                                                                                                                                  |     |  |
|----------------------------------------------------------------------------------------------------------------------------------------------------------------------------------------------------------------------------------------------------------------------------------------------------------------------------------------------------------------------------------------------------------------------------------------------------------------------------------------------------------------------------------------------------------------------------------------------------------------------------------------------------------------------------------------------------------------------------------------------------------------------------------------------------------------------------------------------------------------------------------------------------------------------------------------------------------------------------------------------------------------------------------------------------------------------------------------------------------------------------------------------------------------------------------------------------------------------------------------------------------------------------------------------------------------------------------------------------------------------------------------------------------------------------------------------------------------------------------------------------------------------------------------------------------------------------------------------------------------------------------------------------------------------------------------------------------------------------------------------------------------------------------------------------------------------------------------------------------------------------------------------------------------------------------------------------------------------------------------------------------------------------------|-----|--|
| <p>OR "rehabilitated" OR "rehabilitates" OR "rehabilitating" OR "rehabilitation"<br/> OR "rehabilitation" OR "rehabilitations" OR "rehabilitative" OR "rehabilitation"<br/> OR "rehabilitation s" OR "rehabilitational" OR "rehabilitator" OR "rehabilitators") ))<br/> OR ("physical therapy modalities" OR ("physical" AND "therapy" AND<br/> "modalities") OR "physical therapy modalities" OR "physiotherapies" OR<br/> "physiotherapy") OR ("physical therapy modalities" OR ("physical" AND<br/> "therapy" AND "modalities") OR "physical therapy modalities" OR<br/> "physiotherapies"<br/> OR "physiotherapy") OR ("therapeutic" OR "therapeutically" OR<br/> "therapeutics" OR "therapeutics" OR "therapeutics" OR<br/> "therapeutic") OR ("therapeutics" OR "therapeutics" OR "therapies"<br/> OR "therapy" OR "therapy" OR "therapy s" OR "therapys") OR<br/> ("physiatric" OR "physical and rehabilitation medicine" OR ("physical" AND<br/> "rehabilitation" AND "medicine") OR "physical and rehabilitation medicine" OR<br/> "physiatrics") OR ("physical and rehabilitation medicine" OR ("physical" AND<br/> "rehabilitation" AND<br/> "medicine") OR "physical and rehabilitation medicine" OR "physiatry"))<br/> <i>Indexes=SCI-EXPANDED Timespan: 2020-11-17 to 2022-01-18 (Index Date)</i></p>                                                                                                                                                                                                                                                                                                                                                                                                                                                                                                                                                                                                                                                                                                              |     |  |
| <p>TS= ("exercise" OR "exercise" OR "exercises" OR "exercise therapy" OR<br/> ("exercise" AND<br/> "therapy") OR "exercise therapy" OR "exercise s" OR "exercised" OR "exerciser"<br/> OR "exercisers" OR "exercising" OR ("exercise" OR "exercise" OR "exercises"<br/> OR "exercise therapy" OR ("exercise" AND<br/> "therapy") OR "exercise therapy" OR "exercise s" OR "exercised" OR "exerciser"<br/> OR "exercisers" OR "exercising") OR ("exercise" OR "exercise" OR "exercises"<br/> OR "exercise therapy" OR ("exercise" AND<br/> "therapy") OR "exercise therapy" OR "exercise s" OR "exercised" OR "exerciser"<br/> OR "exercisers" OR "exercising") OR "exercised" OR ("clinical protocols"<br/> OR ("clinical" AND<br/> "protocols") OR "clinical protocols" OR "regimen" OR "regimen s" OR "regimens")<br/> OR ("physical examination" OR ("physical" AND<br/> "examination") OR "physical examination" OR "physical" OR "physically"<br/> OR "physicals") AND ("therapeutics" OR "therapeutics" OR "therapies" OR<br/> "therapy" OR "therapy" OR "therapy s" OR "therapys" OR ("medicin" OR<br/> "medicinal" OR "medicinally" OR "medicinals" OR "medicine" OR "medicine"<br/> OR "medicine s" OR "medicines") OR ("rehabilitation" OR "rehabilitation" OR<br/> "rehab" OR "rehab") OR ("rehabilitant" OR "rehabilitants" OR "rehabilitate"<br/> OR "rehabilitated" OR "rehabilitates" OR "rehabilitating" OR "rehabilitation"<br/> OR "rehabilitation" OR "rehabilitations" OR "rehabilitative" OR "rehabilitation"<br/> OR "rehabilitation s" OR "rehabilitational" OR "rehabilitator" OR "rehabilitators") ))<br/> OR ("physical therapy modalities" OR ("physical" AND "therapy" AND<br/> "modalities") OR "physical therapy modalities" OR "physiotherapies" OR<br/> "physiotherapy") OR ("physical therapy modalities" OR ("physical" AND<br/> "therapy" AND "modalities") OR "physical therapy modalities" OR<br/> "physiotherapies"<br/> OR "physiotherapy") OR ("therapeutic" OR "therapeutically" OR</p> | 181 |  |

|                                                                                                                                                                                                                                                                                                                                                                                                                                                                                                                                                                                                |  |  |
|------------------------------------------------------------------------------------------------------------------------------------------------------------------------------------------------------------------------------------------------------------------------------------------------------------------------------------------------------------------------------------------------------------------------------------------------------------------------------------------------------------------------------------------------------------------------------------------------|--|--|
| "therapeuticals" OR "therapeutics" OR "therapeutics" OR<br>"therapeutic") OR ("therapeutics" OR "therapeutics" OR "therapies"<br>OR "therapy" OR "therapy" OR "therapy s" OR "therapys") OR<br>("physiatric" OR "physical and rehabilitation medicine" OR ("physical" AND<br>"rehabilitation" AND "medicine") OR "physical and rehabilitation medicine" OR<br>"physiatrics") OR ("physical and rehabilitation medicine" OR ("physical" AND<br>"rehabilitation" AND<br>"medicine") OR "physical and rehabilitation medicine" OR "physiatry"))<br><i>Indexes=SCI-EXPANDED Timespan=All years</i> |  |  |
|------------------------------------------------------------------------------------------------------------------------------------------------------------------------------------------------------------------------------------------------------------------------------------------------------------------------------------------------------------------------------------------------------------------------------------------------------------------------------------------------------------------------------------------------------------------------------------------------|--|--|
