# Supplementary material for: The Safety and Effectiveness of Early, Progressive Weight Bearing and Implant Choice after Traumatic Lower Extremity Fracture: A Systematic Review
Source: Bioengineering (Basel). 2022 Dec 1;9(12):750. doi: 10.3390/bioengineering9120750 (PMC9774827; doi:10.3390/bioengineering9120750)
Supplement: Supplementary file 1 [file bioengineering-09-00750-s001.zip]

Archive with 4 entries (4 files):
- Supplemental File S1_Search Strategy.pdf
- Table S1_Outcomes from Included RCTs and Non-RCTs.pdf
- Table S2_Study Characteristics and Primary Outcomes of Included RCTs.pdf
- Table S3_Study Characteristics and Primary Outcomes of Included Non-RCT Studies.pdf
